# Supplementary material for: Preparation and confinement effect of a heterogeneous 9-amino-9-deoxy-epi-cinchonidine organocatalyst for asymmetric aldol addition in aqueous medium
Source: Royal Society of Chemistry journal article supplement (doi:10.1039/c2dt12390h), 2012-01-01

Electronic supplementary information for *Dalton Trans.*

## Preparation and confinement effect of heterogeneous 9-amino-9-deoxy-epi-cinchonine organocatalyst for asymmetric aldol addition in aqueous medium

Wei Wang, Xuebing Ma,\* Jun Cao, Jingwei Wan, Qian Tang

College of Chemistry and Chemical Engineering, Southwest University, Chongqing, 400715, P. R. China

### 1. NMR spectra of 1a-e and 9-amino-9-deoxy-epi-cinchonine

9-amino-9-deoxy-epi-cinchonine:

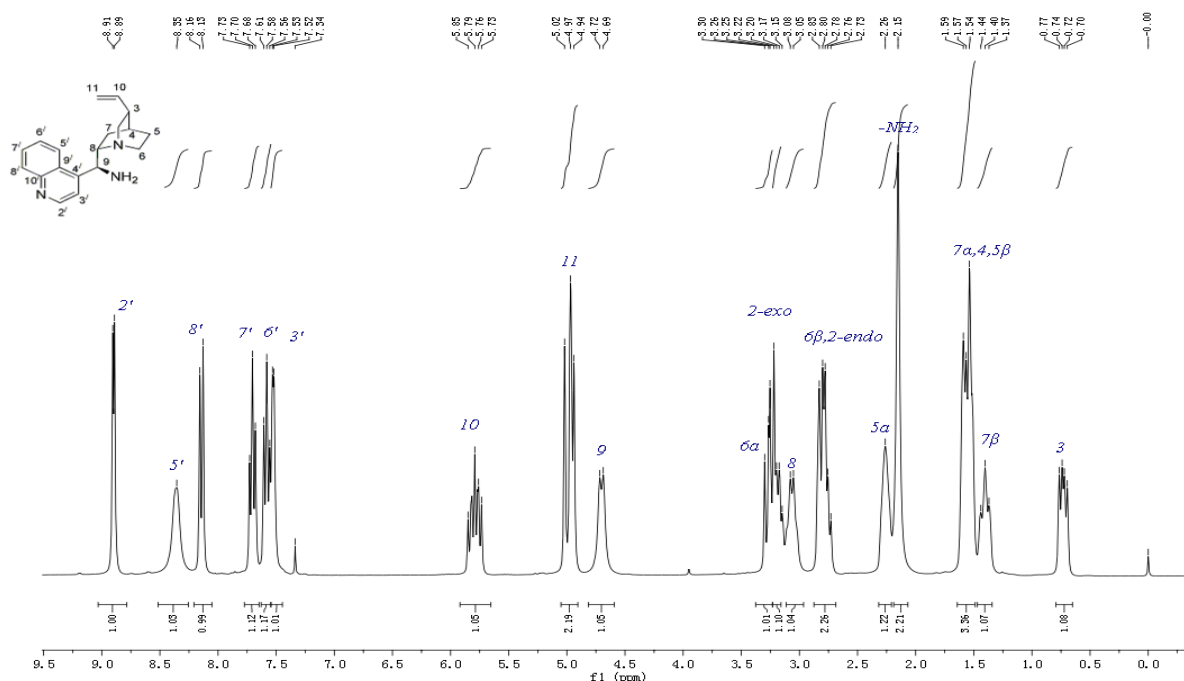

$^1\text{H}$  NMR (300M Hz,  $\text{CDCl}_3$ , TMS):  $\delta$  8.90 (H-2', 1 H, d,  $^3J=6.0$  Hz), 8.35 (H-5', 1 H, br s,  $^3J=9.0$  Hz), 8.15 (H-8', 1 H, d,  $^3J=3.0$  Hz), 7.70 (H-7', 1 H, t,  $^3J=6.0$  Hz), 7.58 (H-6', 1 H, t,  $^3J=6.0$  Hz), 7.52 (H-3', 1 H, d,  $^3J=2.0$  Hz), 5.78 (H-10, 1 H, ddd), 4.94-5.02 (H-11, 2 H, m), 4.70 (H-9, 1 H, d,  $^3J=9.0$  Hz), 3.26 (H-6 $\alpha$ , dd, 1 H), 3.17 (H-2-exo, q, 1 H), 3.06 (H-8, 1 H, d,  $^3J=9.0$  Hz), 2.73-2.83 (H-6 $\beta$ , H-2-endo, 2 H), 2.26 (H-5 $\alpha$ , s, 1 H), 2.15 (-NH $_2$ , s, 2 H), 1.57-1.59 (H-3, H-4, H-5 $\beta$ , 3 H), 1.40 (H-7 $\beta$ , 1 H), 0.73 (H-7 $\alpha$ , dd, 1 H).  $^{13}\text{C}$  NMR (75M Hz,  $\text{CDCl}_3$ , TMS):  $\delta$  150.1 (C-6'), 148.5 (C-4'), 148.3 (C-2'), 141.6 (C-10), 130.2 (C-10'), 128.8 (C-8'), 127.6 (C-9'), 126.2 (C-7'), 123.1 (C-3'), 119.4 (C-5'), 114.1 (C-11), 77.2 (C-8), 61.7 (C-2), 56.1 (C-9), 40.7 (C-6), 39.5 (C-3), 27.9 (C-5), 27.3 (C-7), 25.8 (C-4).

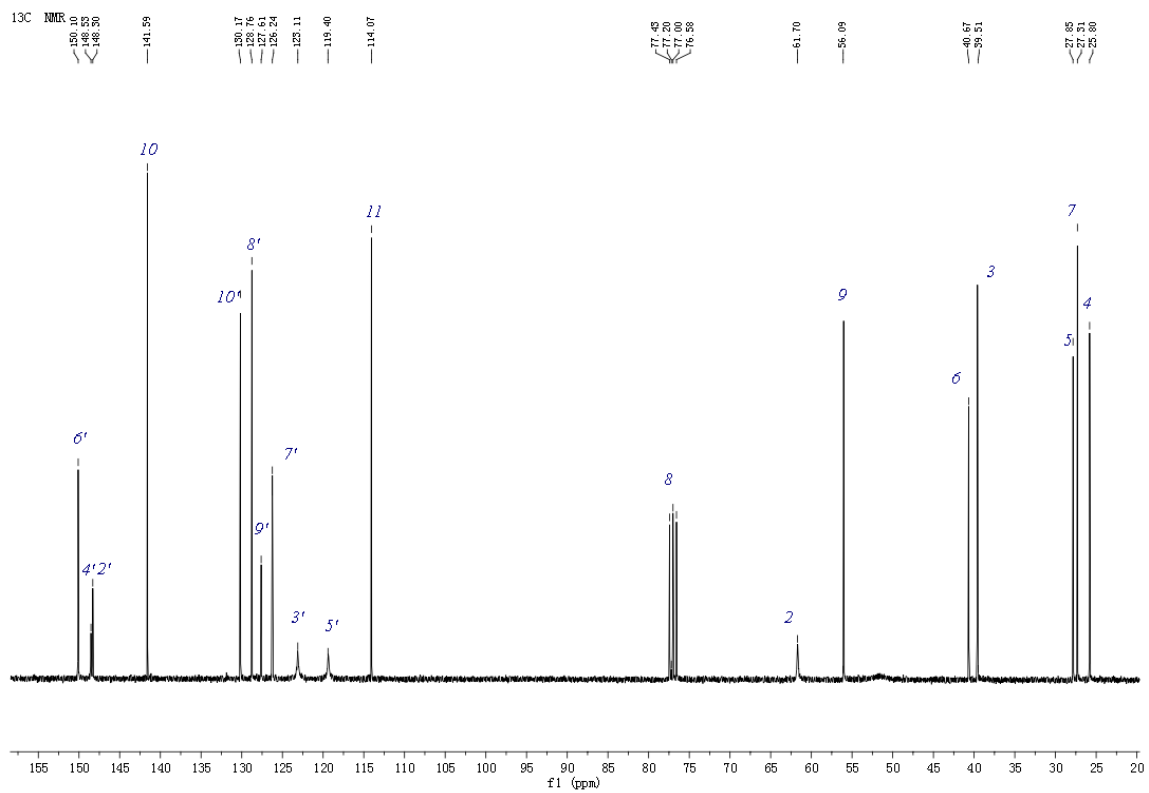

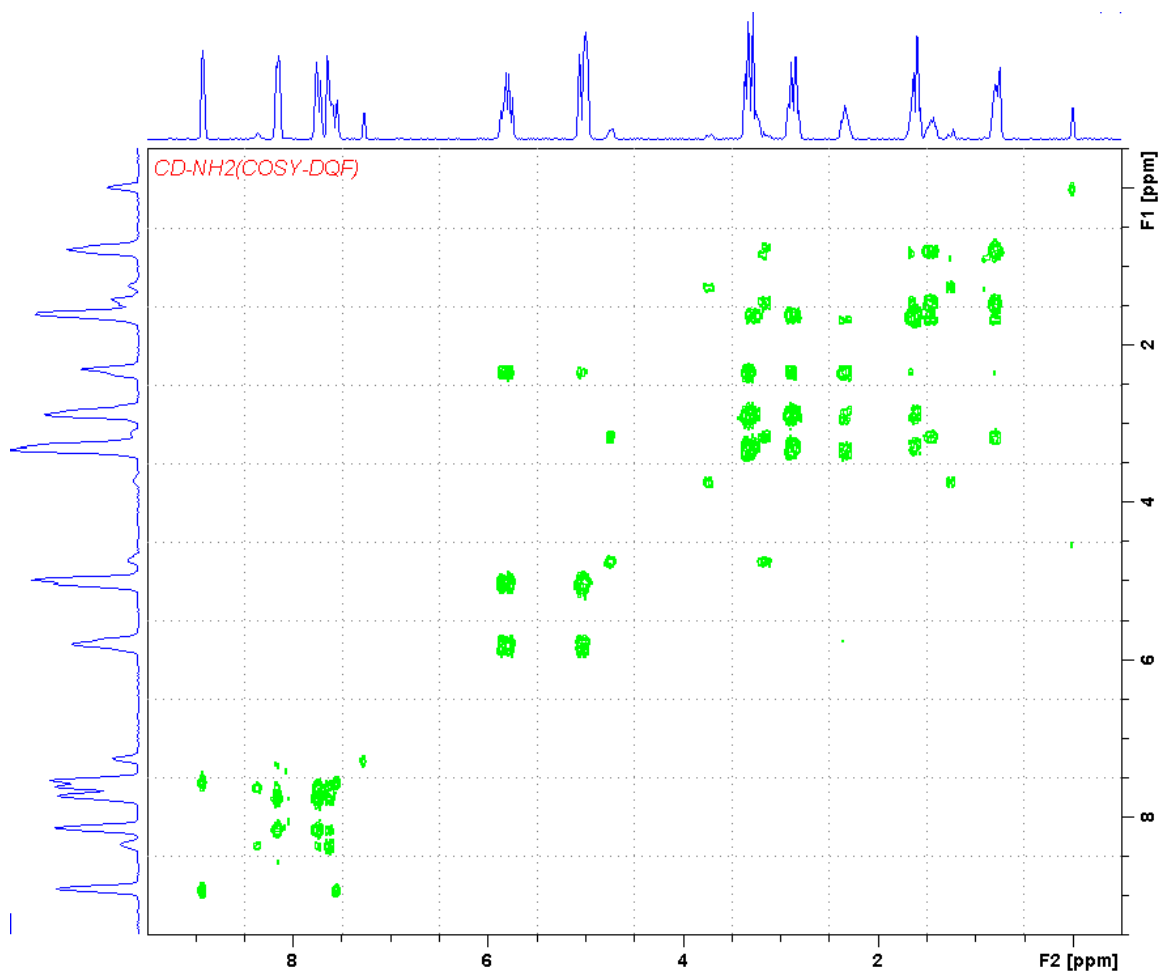

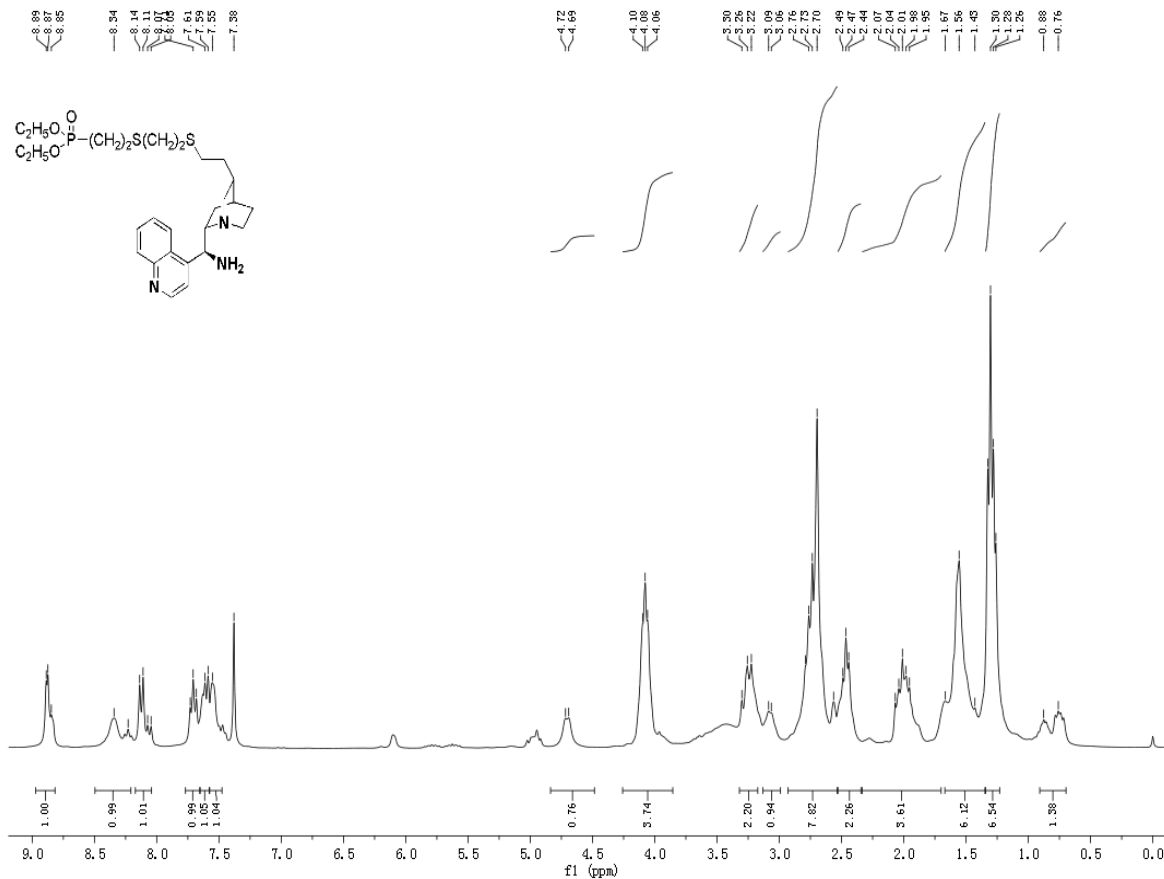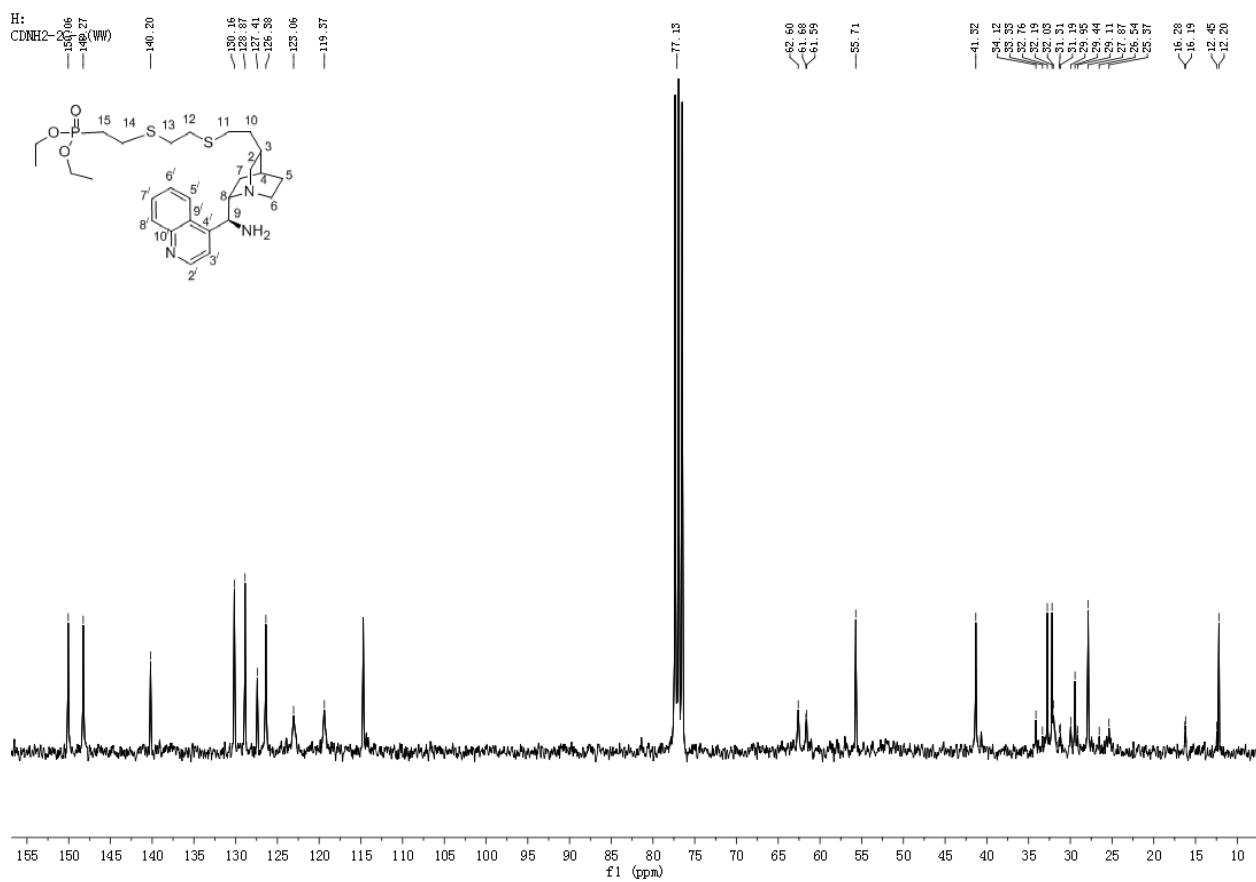

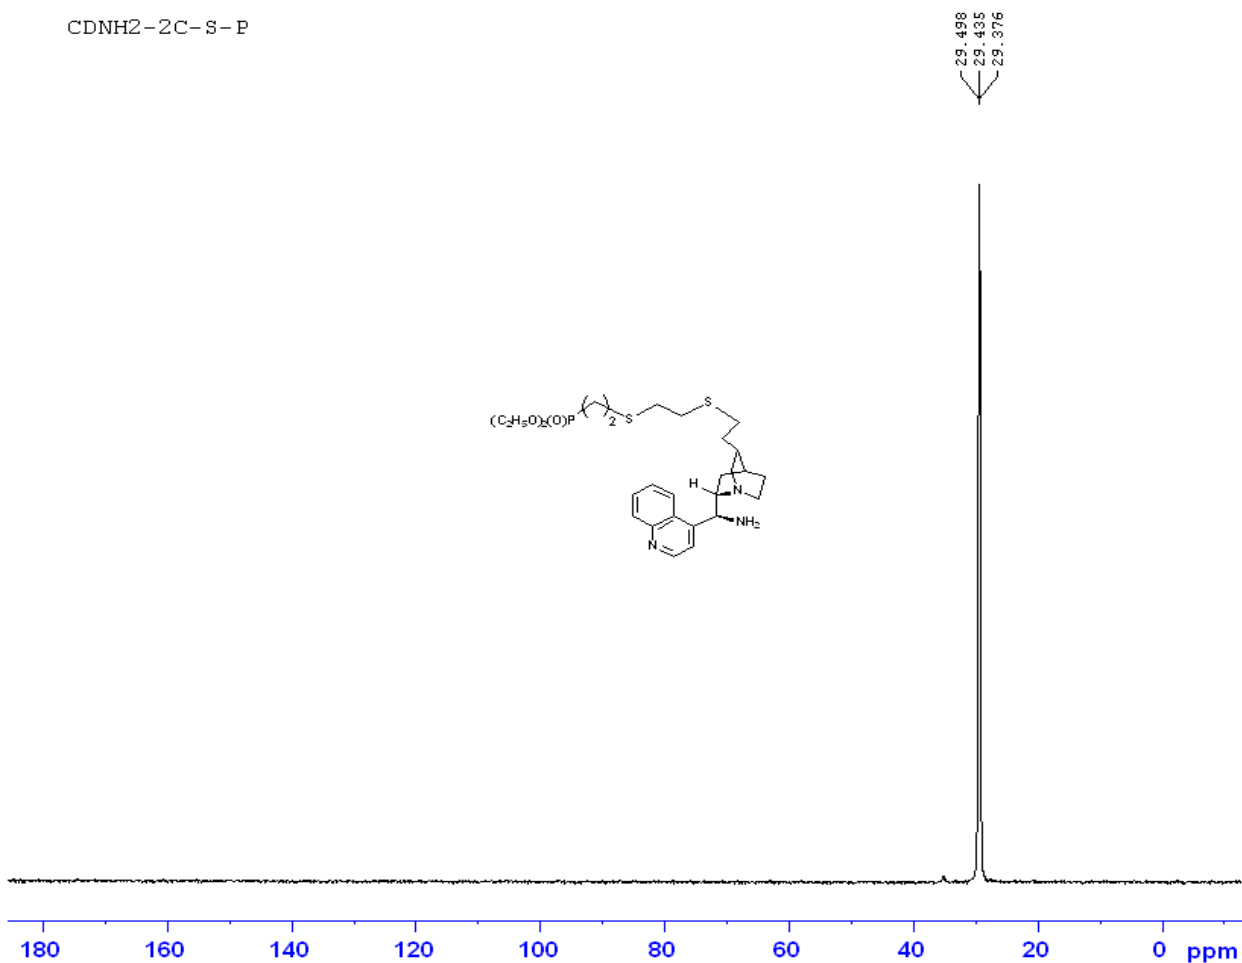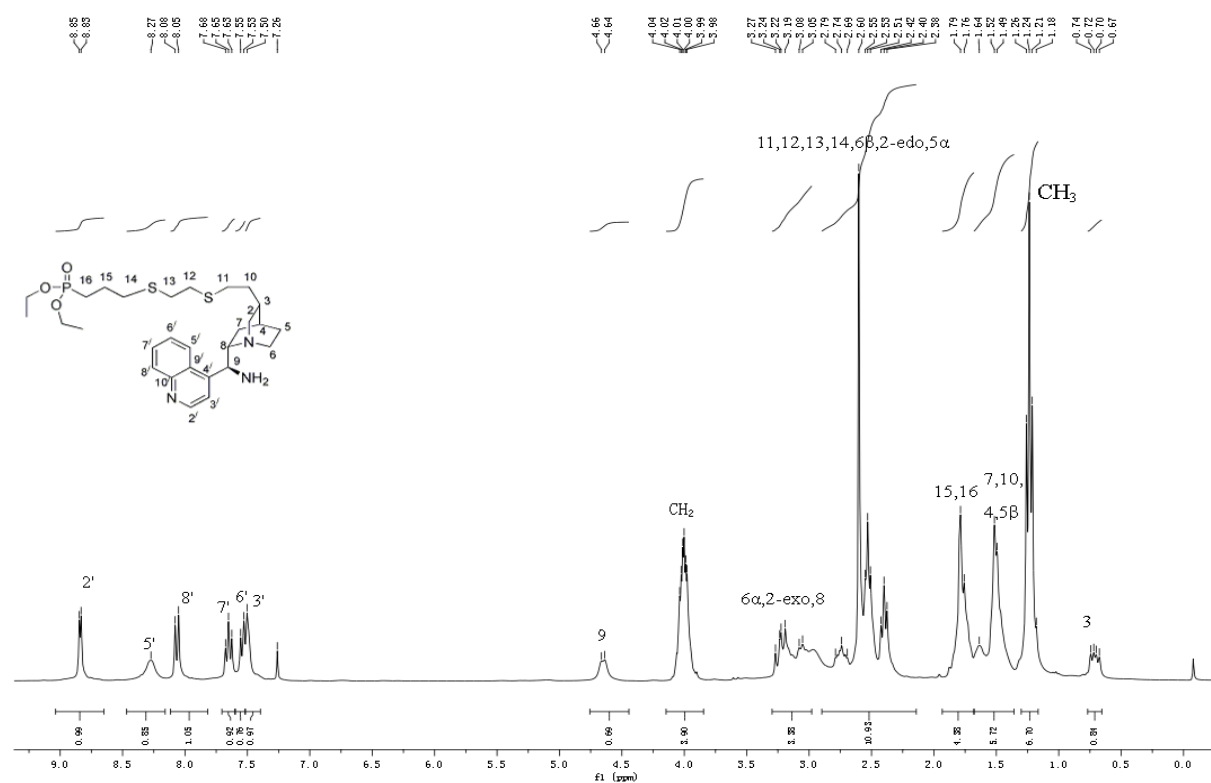

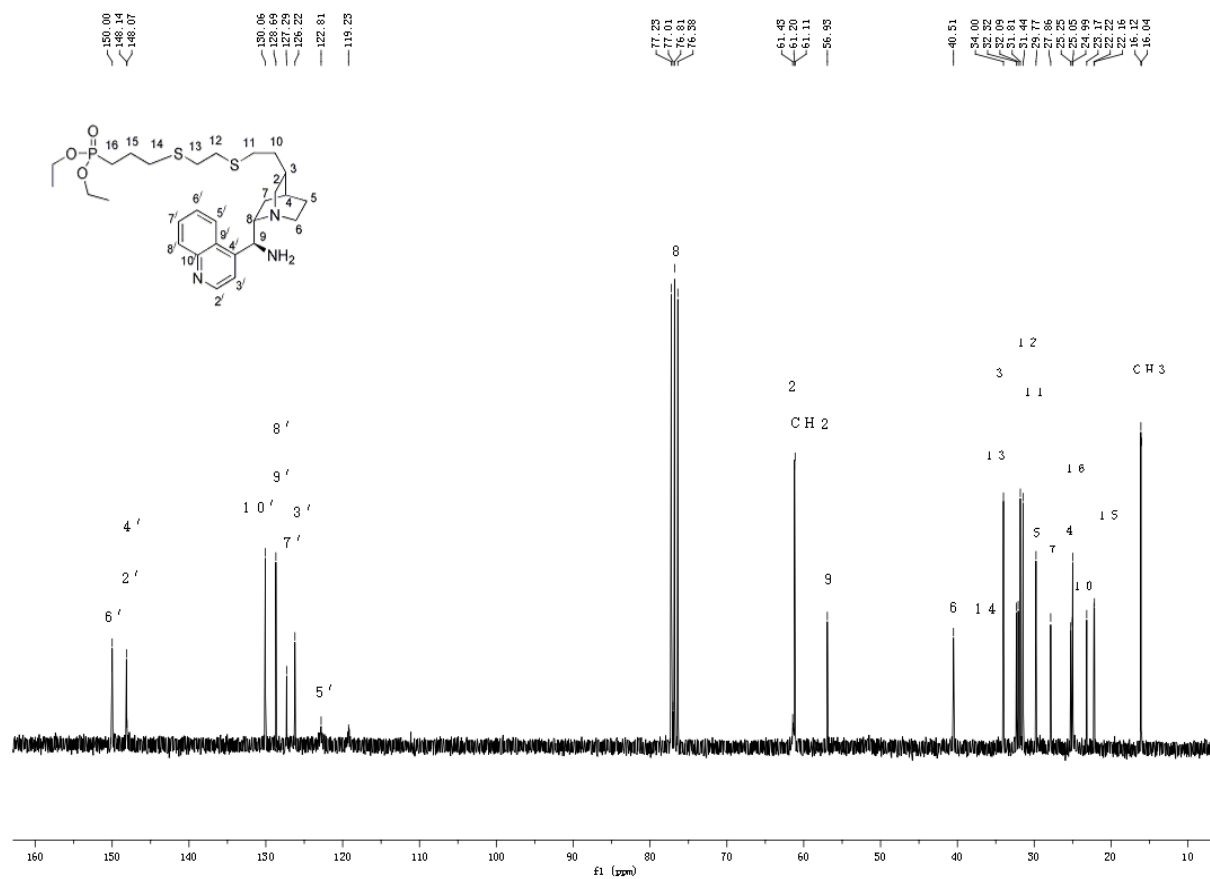

CDNH2-3C-S-P

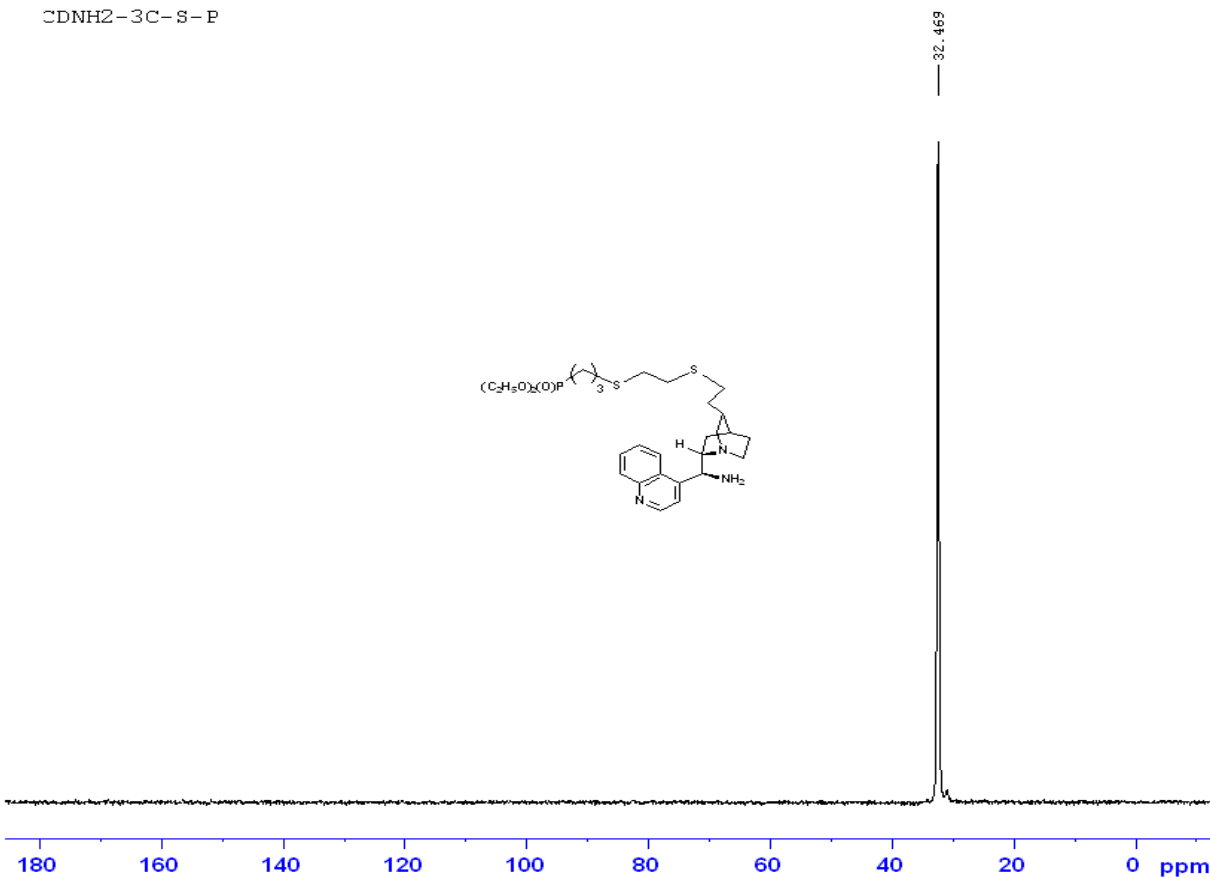

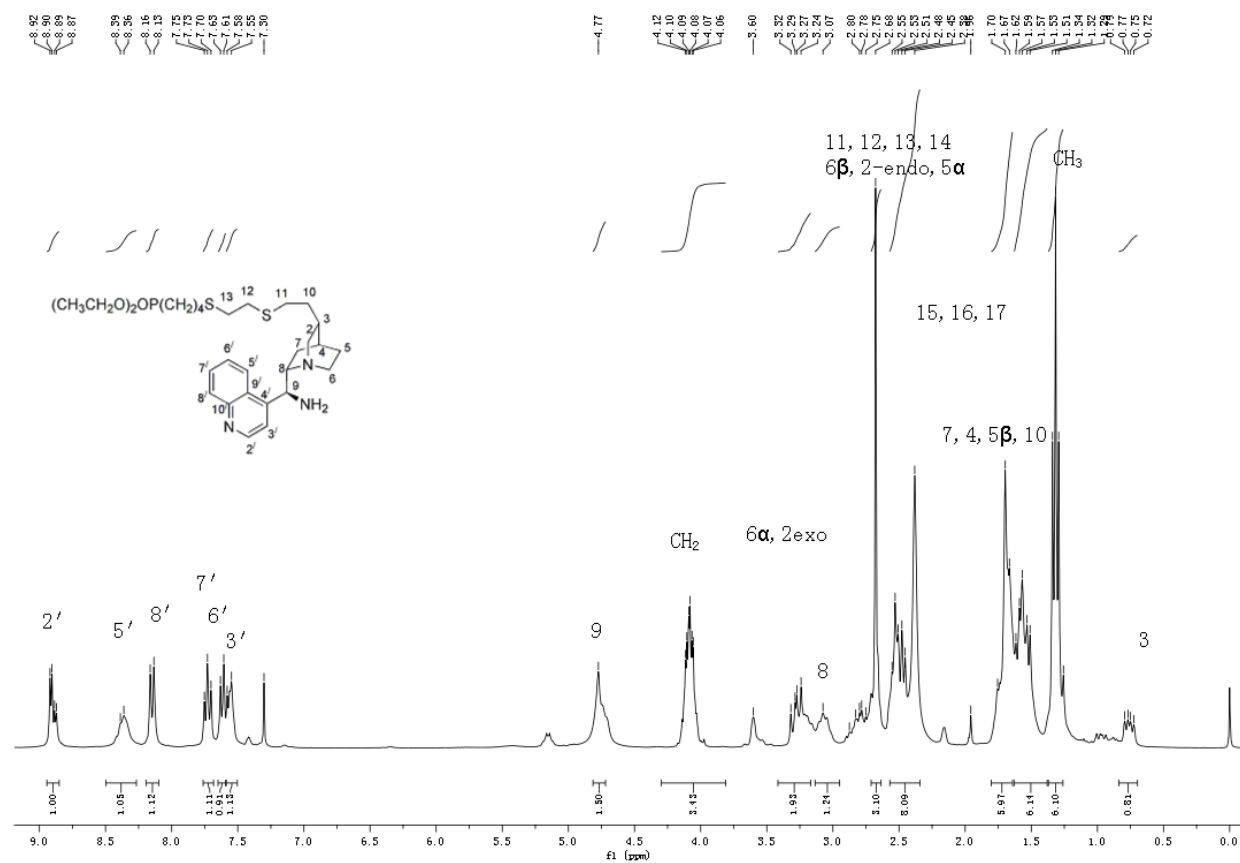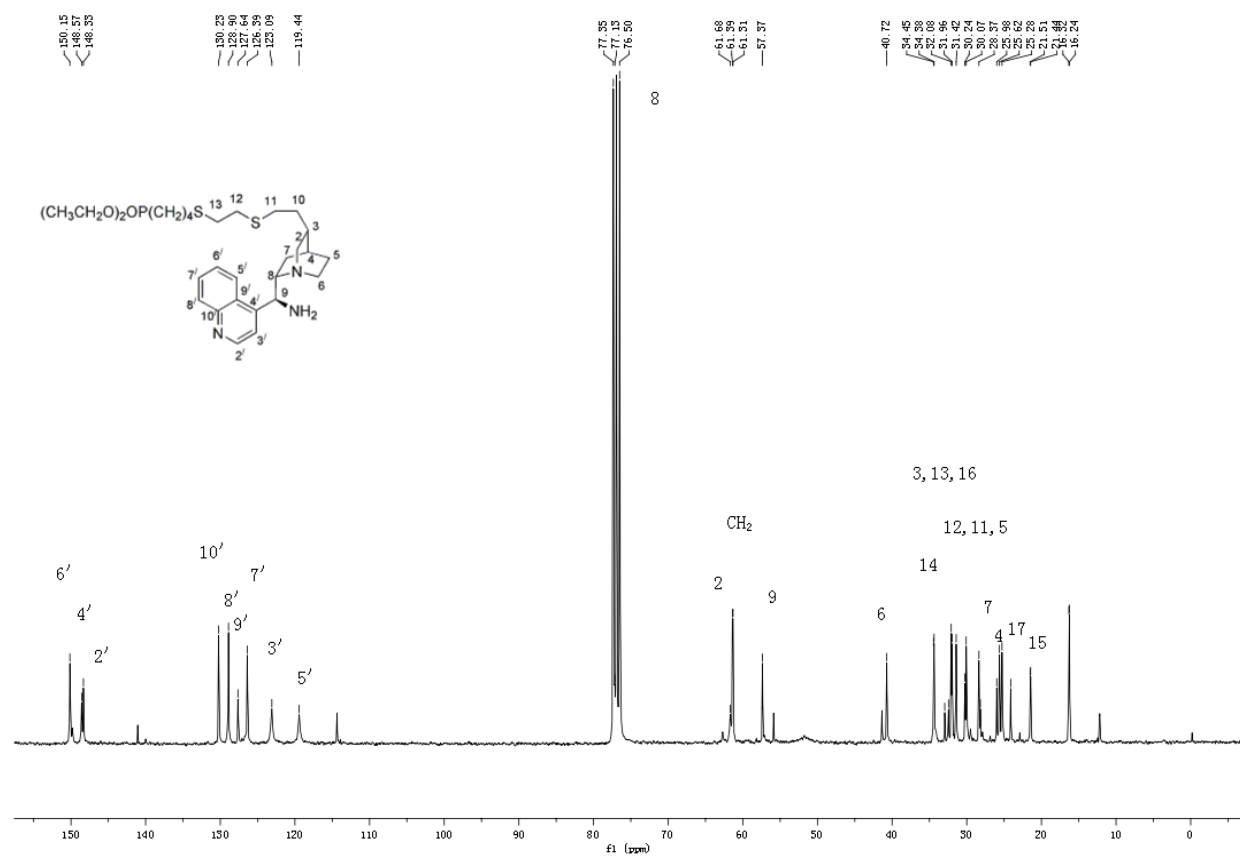

CD-NH2-4C

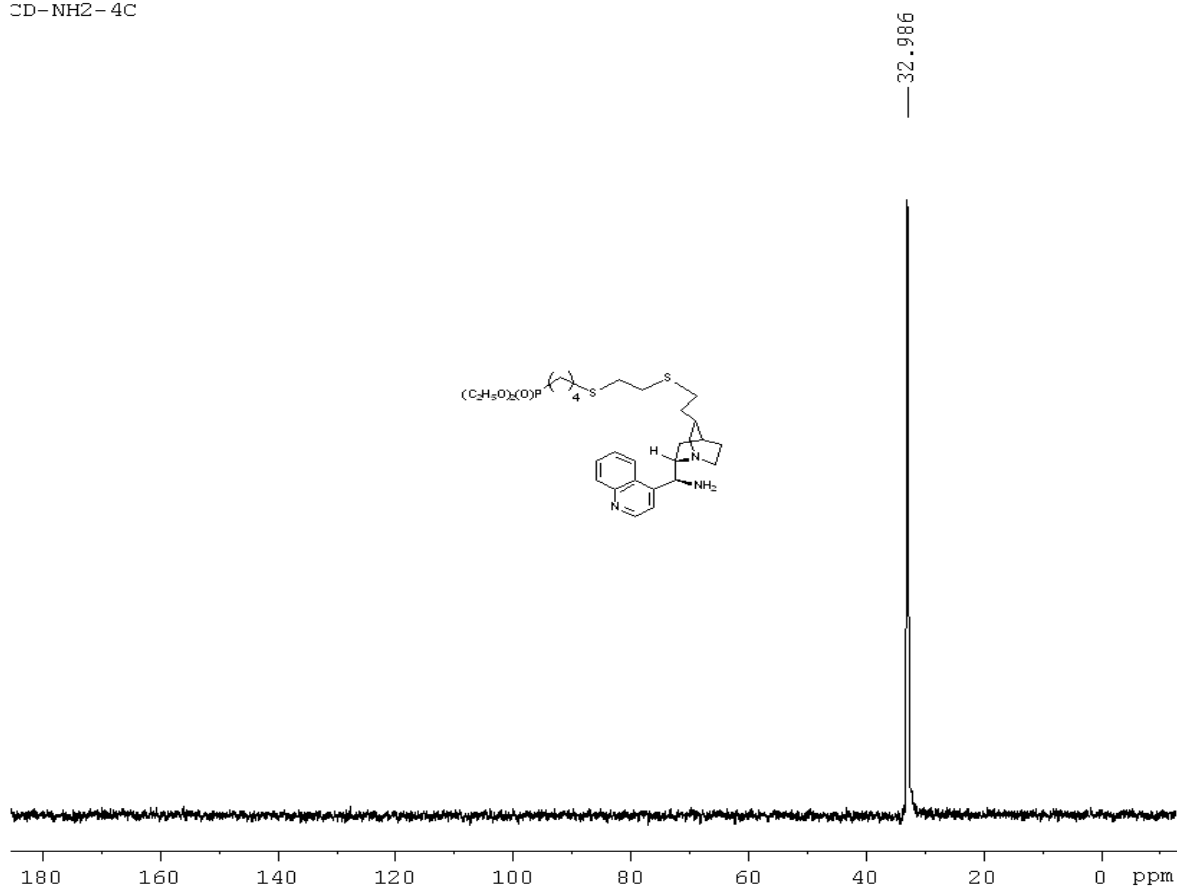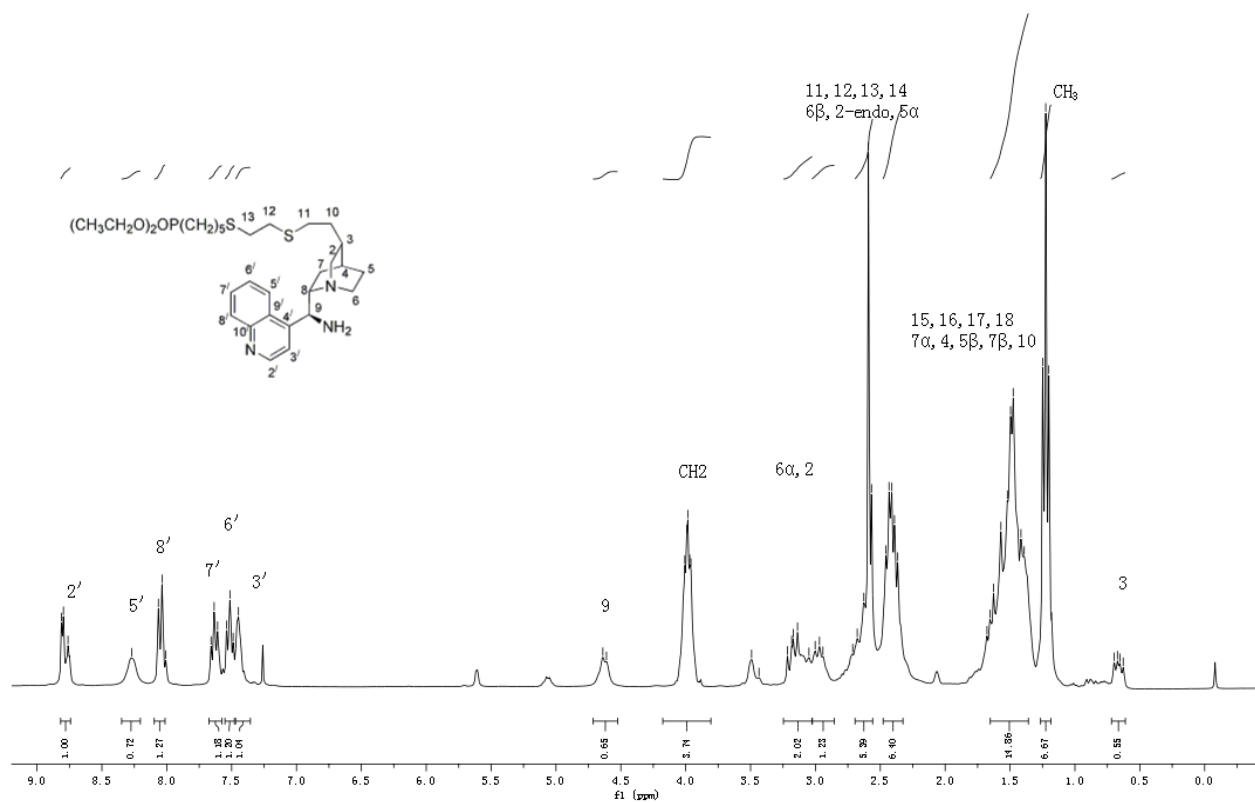



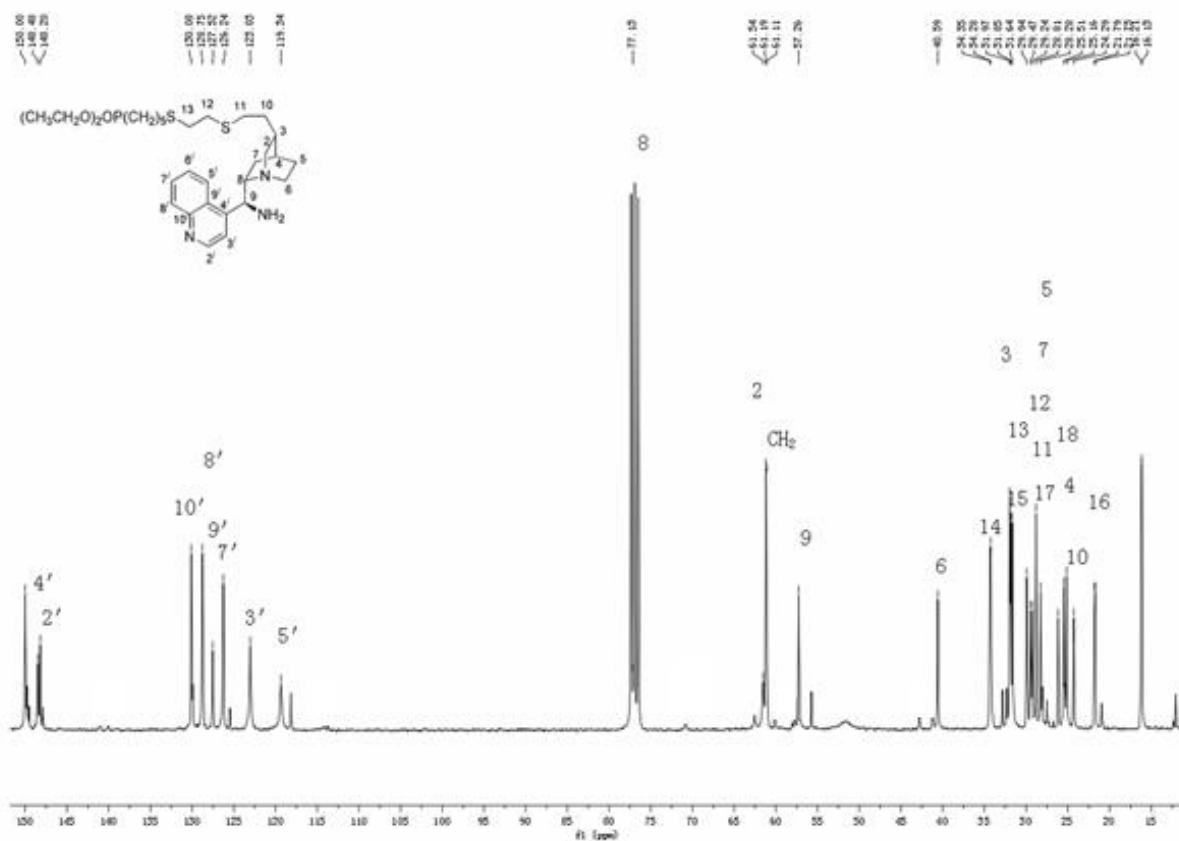

CD-NH2-5C

33.366  
33.239  
33.133

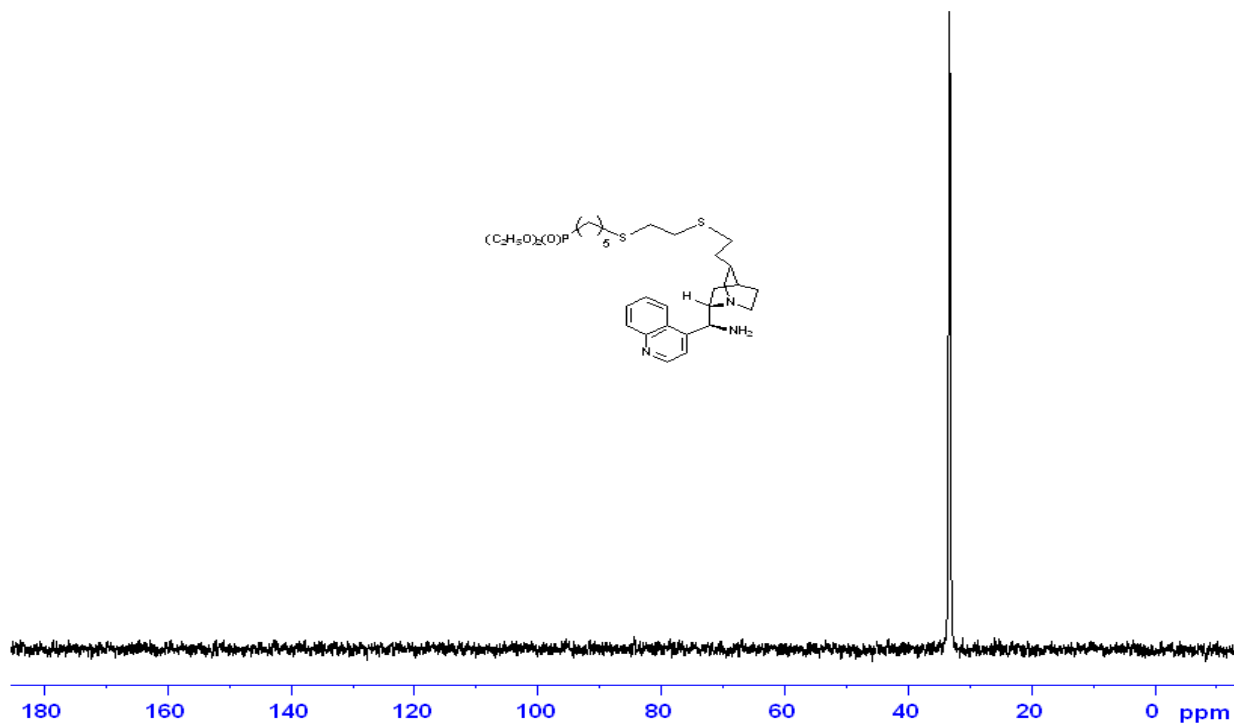

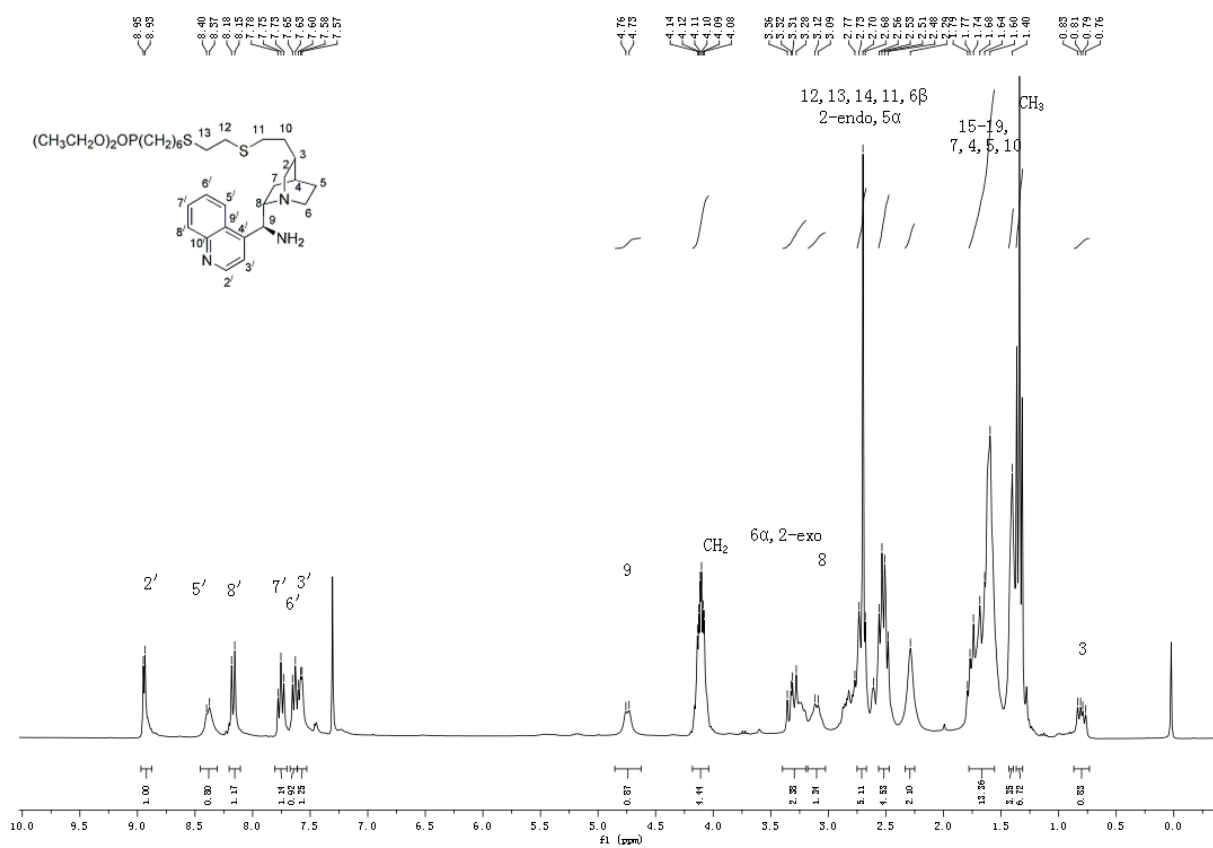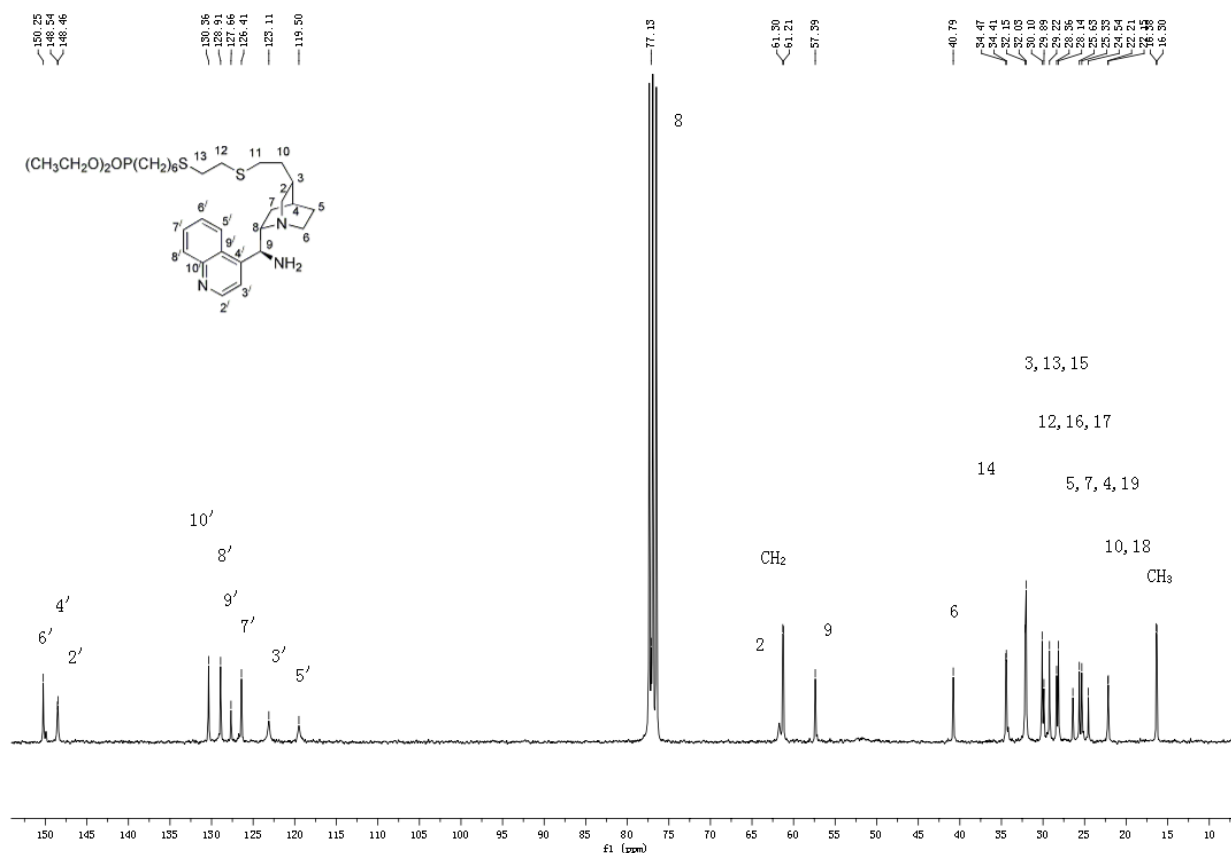

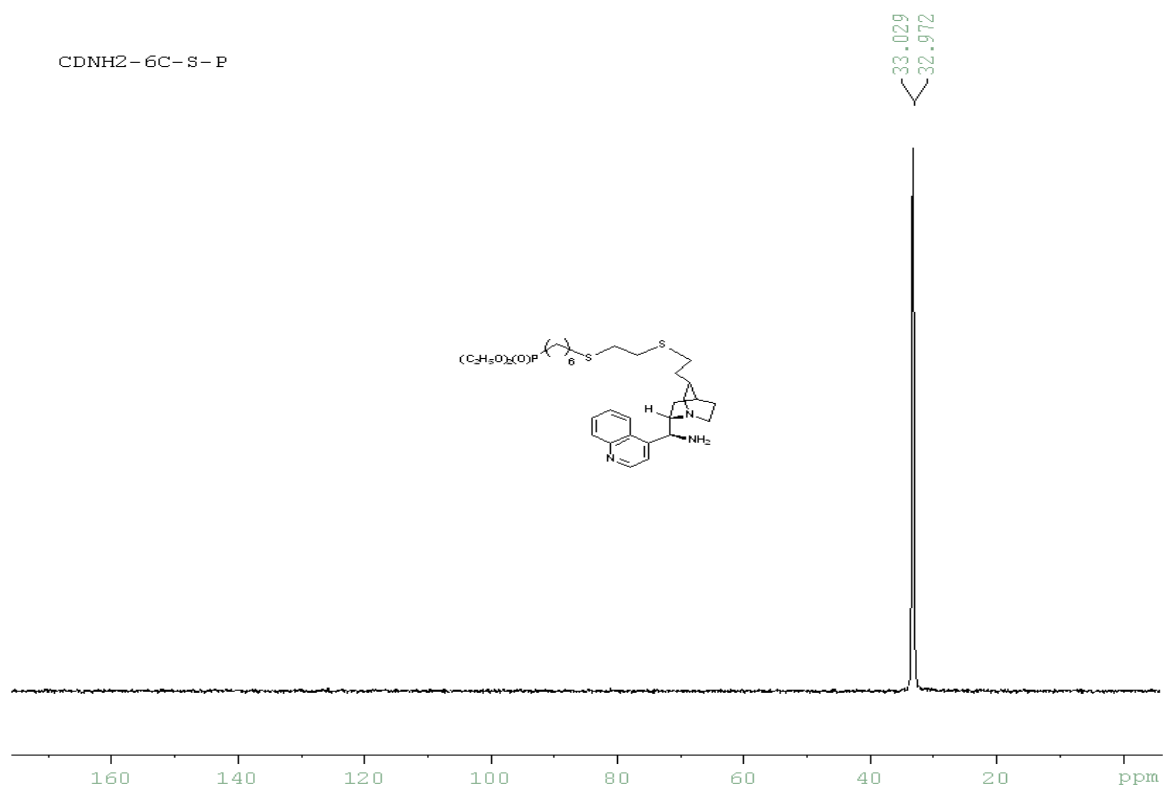

## 2. Elemental analysis of 2a–e

| Catalyst              | Molecular formula                                                                                | Calcd.(Found) (%) |             |             |
|-----------------------|--------------------------------------------------------------------------------------------------|-------------------|-------------|-------------|
|                       |                                                                                                  | C                 | H           | N           |
| <b>2a</b>             | Zr(OH) <sub>3.18</sub> (O <sub>3</sub> PR) <sub>0.41</sub> ·1.98H <sub>2</sub> O                 | 29.24 (29.01)     | 6.29 (6.46) | 4.44 (4.23) |
| <b>2b</b>             | Zr(OH) <sub>3.14</sub> (O <sub>3</sub> PR) <sub>0.43</sub> ·1.76H <sub>2</sub> O                 | 30.64 (30.23)     | 6.41 (6.59) | 4.53 (4.34) |
| <b>2c</b>             | Zr(OH) <sub>2.88</sub> (O <sub>3</sub> PR) <sub>0.56</sub> ·2.89H <sub>2</sub> O                 | 34.31 (33.98)     | 7.02 (7.43) | 4.80 (4.59) |
| <b>2d</b>             | Zr(OH) <sub>3.26</sub> (O <sub>3</sub> PR) <sub>0.37</sub> ·2.02H <sub>2</sub> O                 | 30.07 (30.12)     | 6.52 (6.61) | 4.05 (4.21) |
| <b>2e</b>             | Zr(OH) <sub>3.04</sub> (O <sub>3</sub> PR) <sub>0.48</sub> ·2.28H <sub>2</sub> O                 | 34.46 (34.12)     | 7.00 (7.37) | 4.46 (4.51) |
| <b>3b</b>             | Zr(OH) <sub>3.18</sub> (O <sub>3</sub> PR) <sub>0.41</sub> ·1.12H <sub>2</sub> O                 | 35.00 (35.24)     | 6.95 (7.21) | 5.10 (4.88) |
| <b>3c</b>             | Zr(OH) <sub>3.22</sub> (O <sub>3</sub> PR) <sub>0.39</sub> ·1.47H <sub>2</sub> O                 | 30.83 (30.38)     | 6.35 (6.89) | 4.31 (4.10) |
| <b>4c</b>             | Zr(OH) <sub>3.12</sub> (O <sub>3</sub> PR) <sub>0.44</sub> ·1.41H <sub>2</sub> O                 | 32.61 (32.68)     | 6.46 (6.51) | 4.56 (4.46) |
| <b>5c<sub>1</sub></b> | Zr(O <sub>3</sub> POH) <sub>1.71</sub> (O <sub>3</sub> PR) <sub>0.29</sub> ·2.14H <sub>2</sub> O | 19.43 (19.40)     | 4.31 (4.44) | 2.72 (2.43) |
| <b>5c<sub>2</sub></b> | Zr(O <sub>3</sub> POH) <sub>1.78</sub> (O <sub>3</sub> PR) <sub>0.22</sub> ·1.54H <sub>2</sub> O | 16.24 (16.09)     | 3.68 (3.92) | 2.27 (2.26) |
| <b>5c<sub>3</sub></b> | Zr(O <sub>3</sub> POH) <sub>1.81</sub> (O <sub>3</sub> PR) <sub>0.19</sub> ·1.21H <sub>2</sub> O | 14.71 (14.54)     | 3.34 (4.02) | 2.06 (1.91) |

### 3. TGA analysis

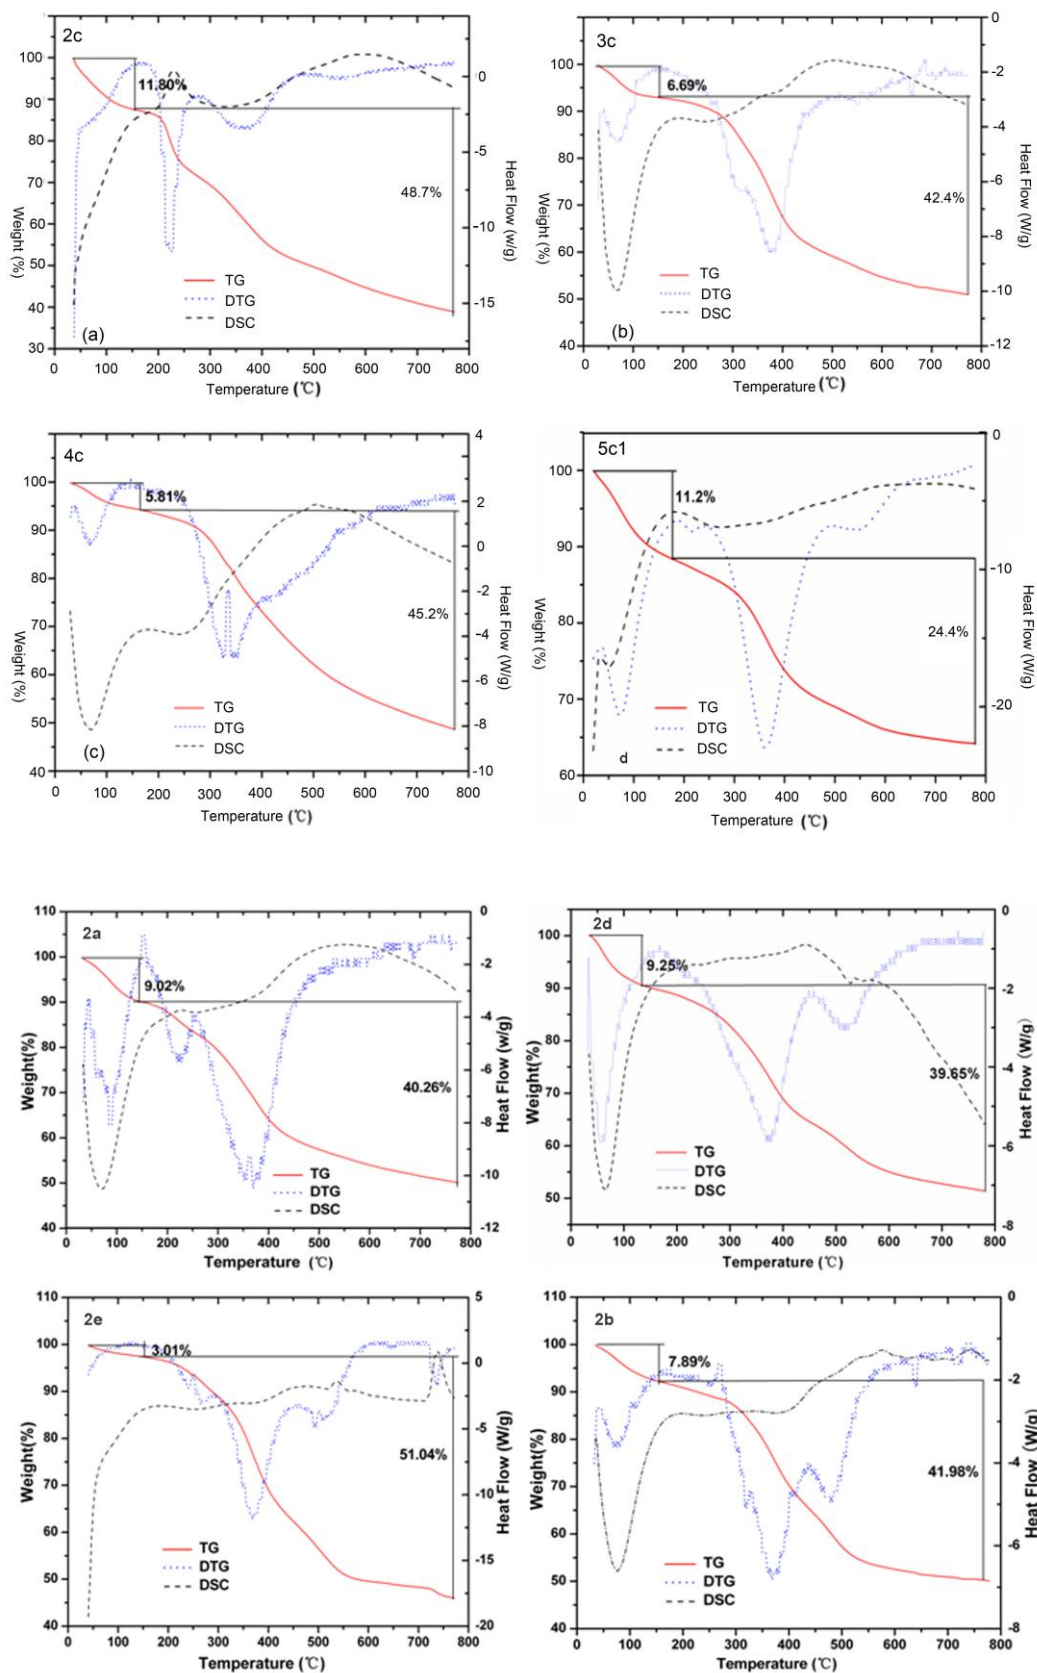

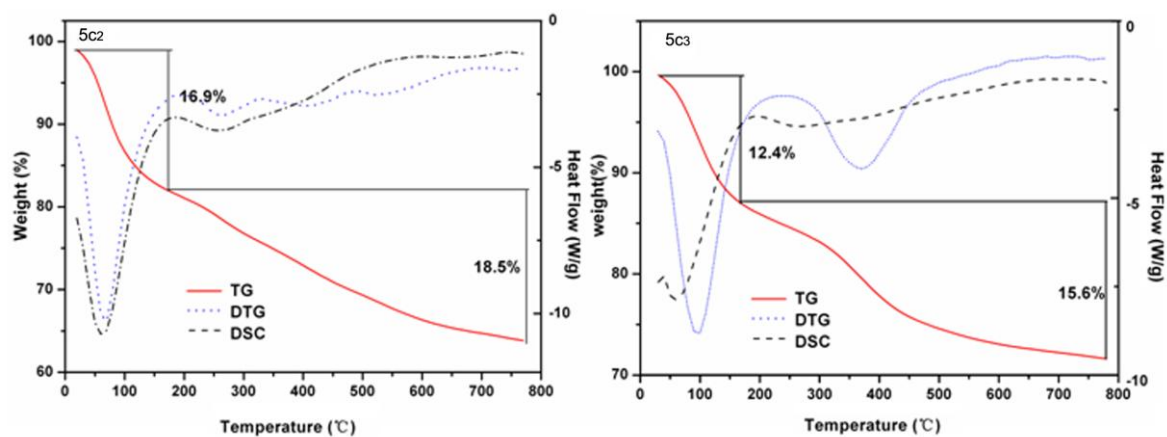

Fig.S1

#### 4. IR spectra

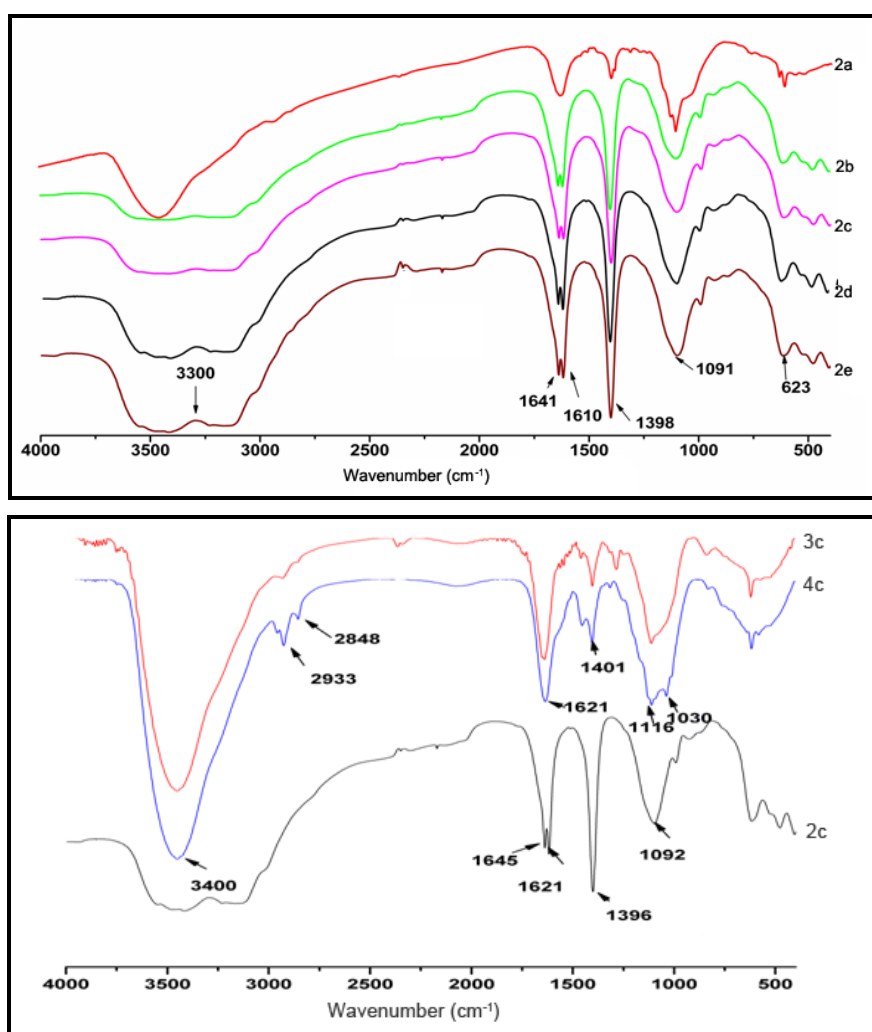

Fig.S2

### 5. XRD spectra

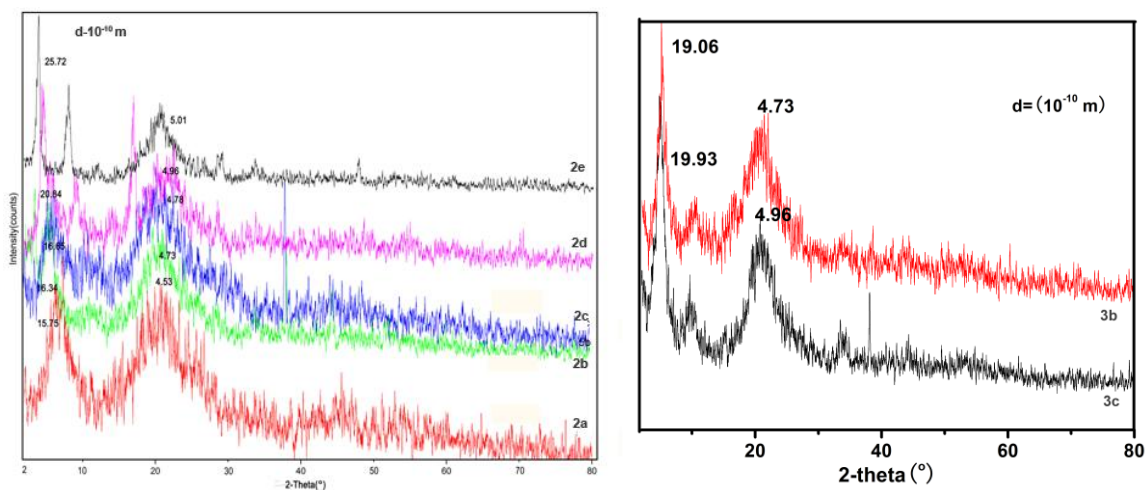

Fig.S3 The powder XRD patterns of zirconium phosphonates 2a-e and 3b, c

### 6. Nitrogen adsorption–adsorption isotherms

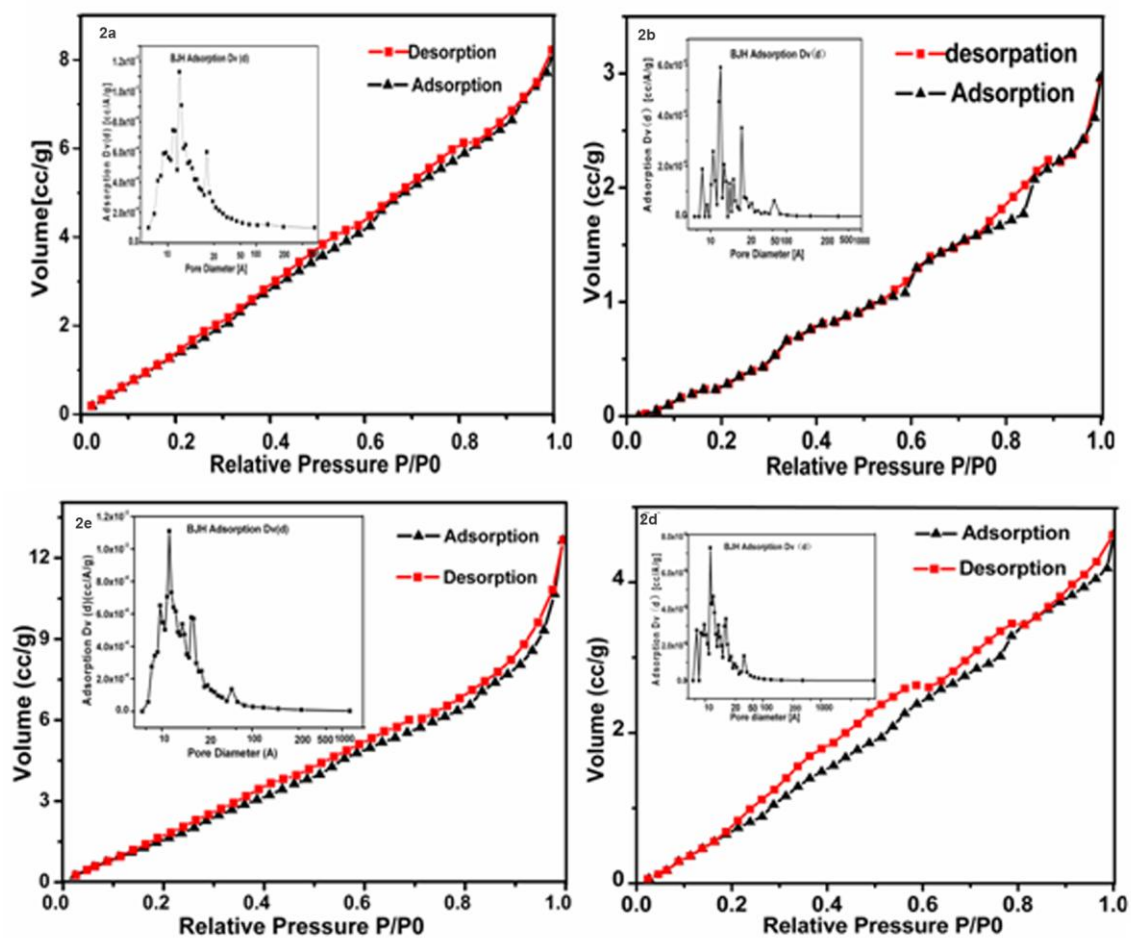

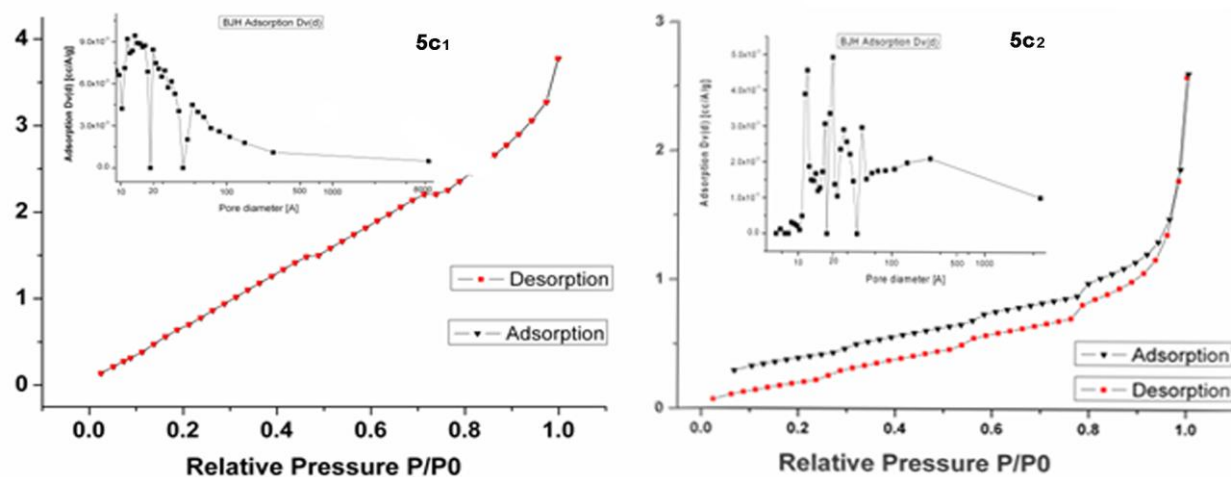

Fig.S4 Nitrogen adsorption–desorption isotherm plots

## 7.AFM images

### (1) Zirconium phosphonate 3c

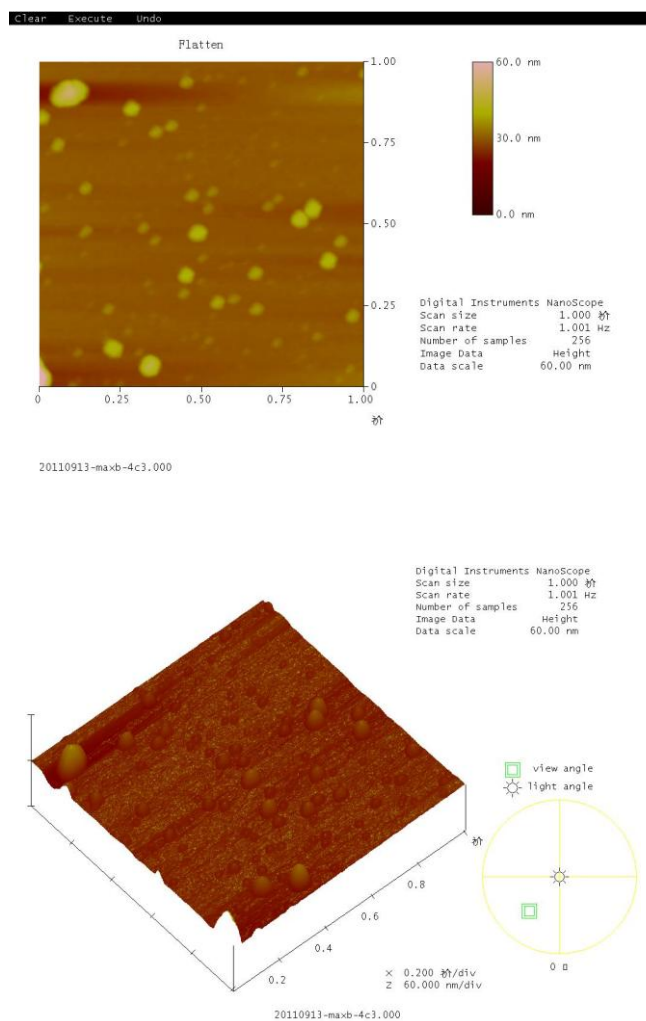

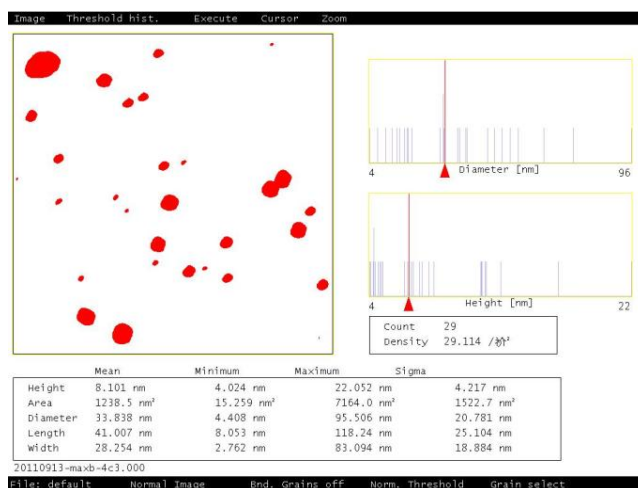

**Fig.S 5** AFM images of zirconium phosphonate **3c**

(2) Zirconium phosphonate **4c**

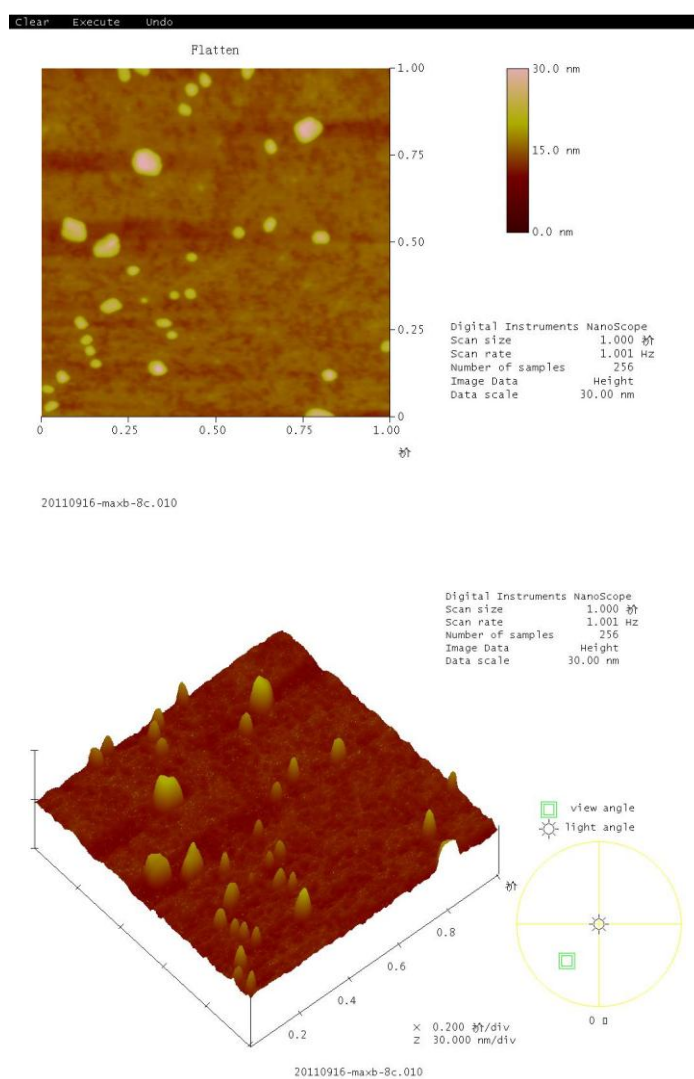



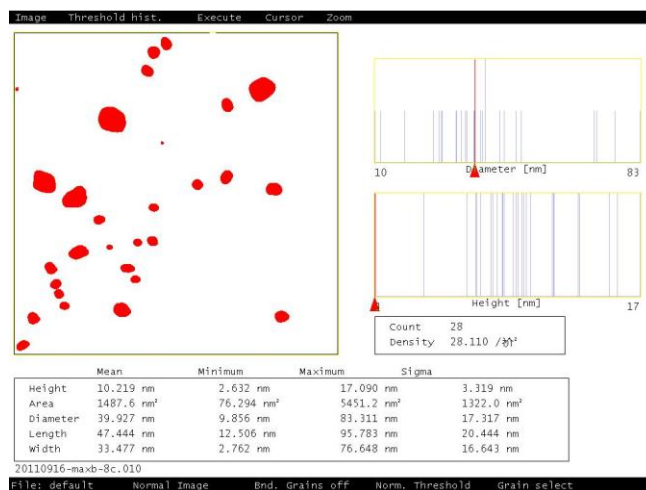

**Fig.S6** AFM images of zirconium phosphonate **4c**

(3) Zirconium phosphonate **5c<sub>1</sub>**

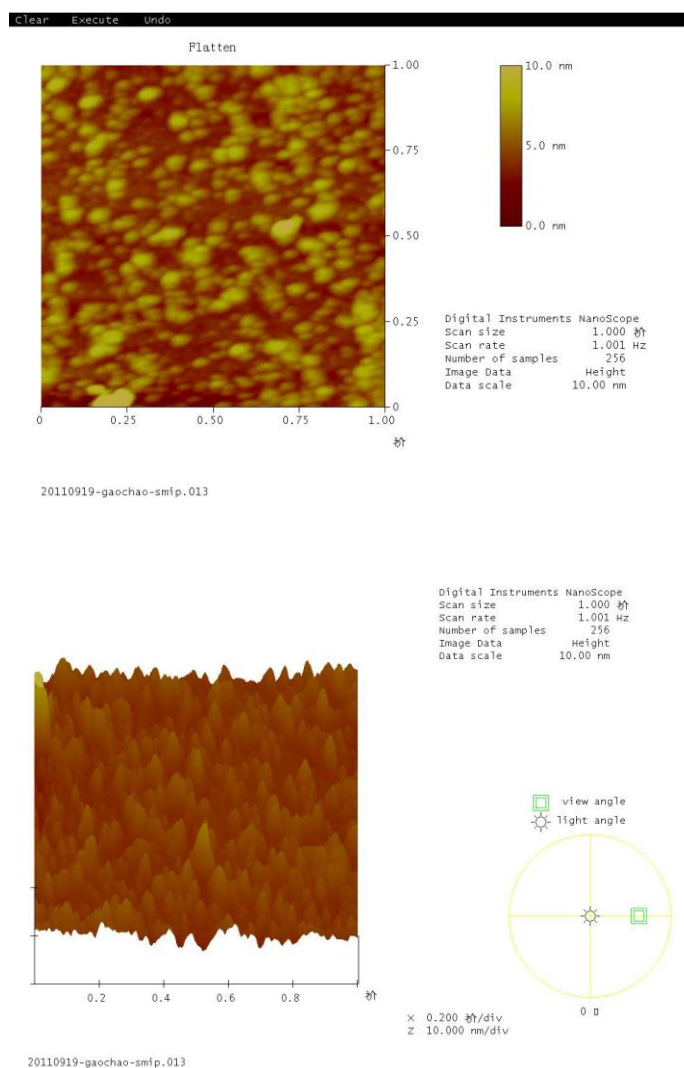

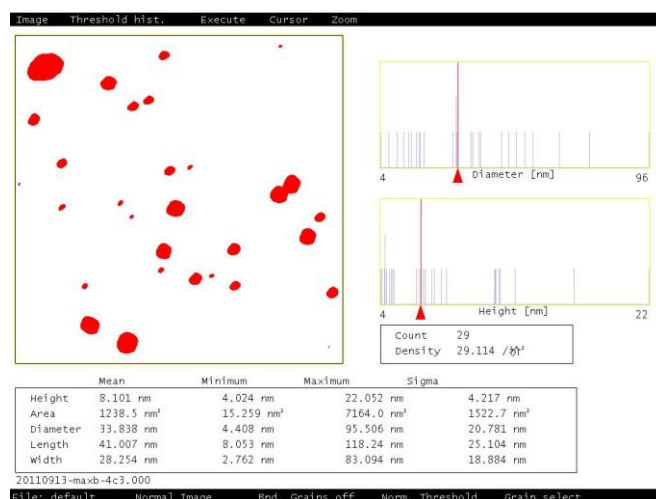

**Fig.S7** AFM images of zirconium phosphonate **5c<sub>1</sub>**

## 8. Influence of other factors on the catalytic properties

### (1) The acidic additives

**Table S1.**

The direct asymmetric aldol reaction of 4-nitrobenzaldehyde and cyclohexanone in water<sup>a</sup>

| Entry | additive                      | Yield (%) <sup>b</sup> | ee(anti) <sup>c</sup> | ee (%) (syn) <sup>c</sup> | dr(anti/syn) |
|-------|-------------------------------|------------------------|-----------------------|---------------------------|--------------|
| 1     | <i>P</i> -TsOH                | 45                     | 9                     | 17                        | 56/44        |
| 2     | HOAc                          | 71                     | 78                    | 47                        | 65/35        |
| 3     | HCl                           | 90                     | 90                    | 7                         | 77/23        |
| 4     | 4-NO <sub>2</sub> PhCOOH      | 94                     | 90                    | 2                         | 79/21        |
| 5     | TFA                           | 64                     | 85                    | 29                        | 73/27        |
| 6     | ( <i>S</i> )-NCM              | 47                     | 69                    | 23                        | 63/37        |
| 7     | PhCOOH                        | 76                     | 92                    | 44                        | 84/16        |
| 8     | ( <i>S</i> )-NCM <sup>d</sup> | 18                     | 47                    | 15                        | 58/42        |
| 9     | TfOH                          | 98                     | 96                    | 25                        | 80/20        |

<sup>a</sup> Reaction conditions: 4-nitrobenzaldehyde (0.25 mmol), cyclohexanone (0.39 mmol), catalyst **3c** (0.025 mmol, 10 mol%), 25 °C, 96 h, 1 mL of water, acidic additive (3.75×10<sup>-3</sup> mmol).

<sup>b</sup> Isolated yield.

<sup>c</sup> Determined by chiral HPLC.

<sup>d</sup> With out catalyst **3c**, NCM=1,1'-bi-2-naphthol cyclic monophosphate.

### (2) Solvents

**Table S2.**

The direct asymmetric aldol reaction of 4-nitrobenzaldehyde and cyclohexanone in water<sup>a</sup>

| Entry | Solvent                                       | Yield (%) <sup>b</sup> | ee(anti) <sup>c</sup> | ee (%) (syn) <sup>c</sup> | dr(anti/syn) |
|-------|-----------------------------------------------|------------------------|-----------------------|---------------------------|--------------|
| 1     | H <sub>2</sub> O                              | 96                     | 96                    | 27                        | 85/15        |
| 2     | THF                                           | 19                     | 48                    | 9                         | 38/62        |
| 3     | DMF                                           | 15                     | 31                    | 8                         | 43/57        |
| 4     | C <sub>2</sub> H <sub>5</sub> OH              | 11                     | 83                    | 5                         | 60/40        |
| 5     | C <sub>6</sub> H <sub>5</sub> CH <sub>3</sub> | 59                     | 5                     | 15                        | 34/66        |
| 6     | CH <sub>3</sub> CN                            | 26                     | 15                    | 0                         | 37/63        |

|   |                   |    |    |    |       |
|---|-------------------|----|----|----|-------|
| 7 | DMSO              | 21 | 9  | 7  | 31/69 |
| 8 | CHCl <sub>3</sub> | 29 | 75 | 64 | 72/28 |

<sup>a</sup> Reaction conditions: 4-nitrobenzaldehyde (0.25 mmol), cyclohexanone (0.39 mmol), catalyst **3c** (0.025 mmol, 10 mol%), 25 °C, 96 h, 1 mL of solvent, acidic additive (3.75×10<sup>-3</sup> mmol).

<sup>b</sup> Isolated yield.

<sup>c</sup> Determined by chiral HPLC.

(3) Temperature, used amount of water and zirconium phosphonate

**Table S3.**

The direct asymmetric aldol reaction of 4-nitrobenzaldehyde and cyclohexanone in water <sup>a</sup>

| Entry | Catalyst (mol%) | Temp. | Water (mL) | Yield (%) <sup>b</sup> | ee(%)<br>(anti) <sup>c</sup> | ee (%) (syn) <sup>c</sup> | dr(anti/syn) |
|-------|-----------------|-------|------------|------------------------|------------------------------|---------------------------|--------------|
| 1     | 10              | 10    | 1          | 76                     | 97                           | 87                        | 64/36        |
| 2     | 10              | 20    | 1          | 92                     | 96                           | 47                        | 80/20        |
| 3     | 10              | 25    | 1          | 98                     | 96                           | 26                        | 81/19        |
| 4     | 10              | 30    | 1          | 94                     | 95                           | 30                        | 77/23        |
| 5     | 10              | 40    | 1          | 93                     | 90                           | 19                        | 83/17        |
| 6     | 10              | 25    | 0.2        | 81                     | 92                           | 17                        | 86/14        |
| 7     | 10              | 25    | 0.5        | 86                     | 94                           | 13                        | 78/22        |
| 8     | 10              | 25    | 1          | 97                     | 95                           | 14                        | 85/15        |
| 9     | 10              | 25    | 2          | 98                     | 93                           | -21                       | 74/26        |
| 10    | 10              | 25    | 3          | 91                     | 92                           | -27                       | 88/12        |
| 11    | 5               | 25    | 1          | 77                     | 91                           | 47                        | 78/22        |
| 12    | 10              | 25    | 1          | 98                     | 96                           | 32                        | 83/17        |
| 13    | 15              | 25    | 1          | 93                     | 93                           | -38                       | 81/19        |
| 14    | 20              | 25    | 1          | 92                     | 94                           | -10                       | 77/23        |
| 15    | 30              | 25    | 1          | 90                     | 92                           | -26                       | 72/28        |

<sup>a</sup> Reaction conditions: 4-nitrobenzaldehyde (0.25 mmol), cyclohexanone (0.39 mmol), catalyst **3c**, 96 h, 1 mL of water, acidic additive (3.75×10<sup>-3</sup> mmol).

<sup>b</sup> Isolated yield.

<sup>c</sup> Determined by chiral HPLC.

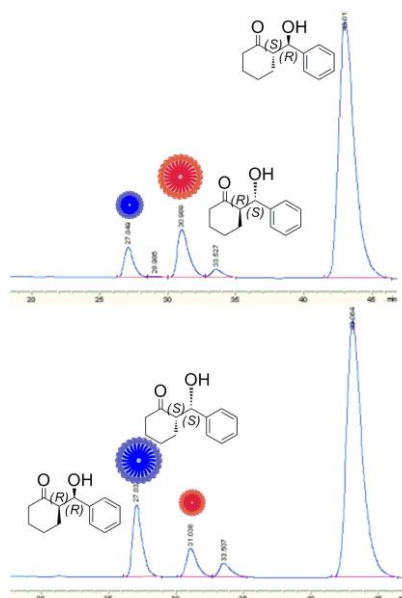

**Fig.S8** The influence of used amounts of supported-catalyst **3c** on catalytic performance (5 and 15 mol%)  
**9. HPLC spectra for some compounds**

(1) The aldol adducts of *o*-nitrobenzaldehyde to cyclohexanone

*Racemic compounds*

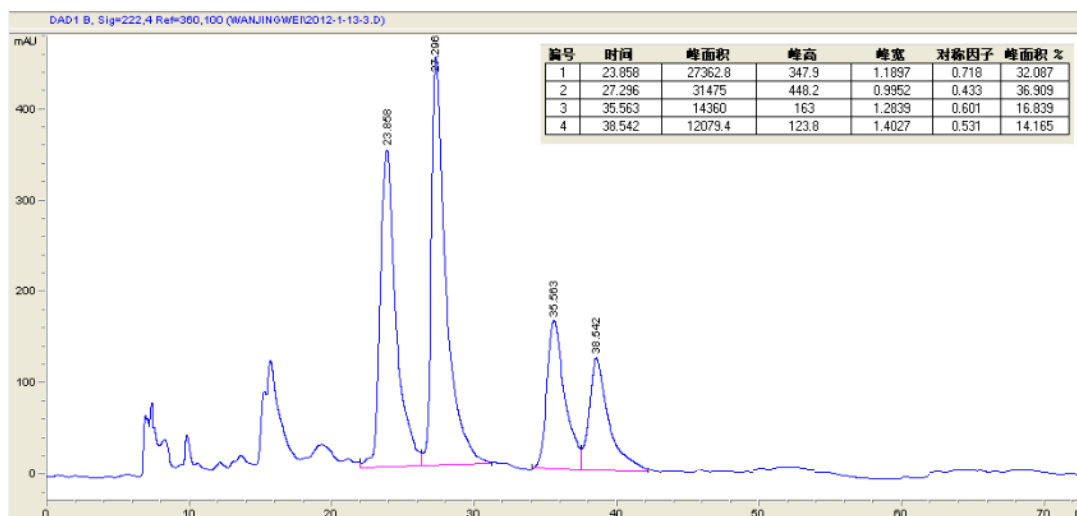

*9-amino-9-deoxy-epi-cinchonine-catalyzed adducts*

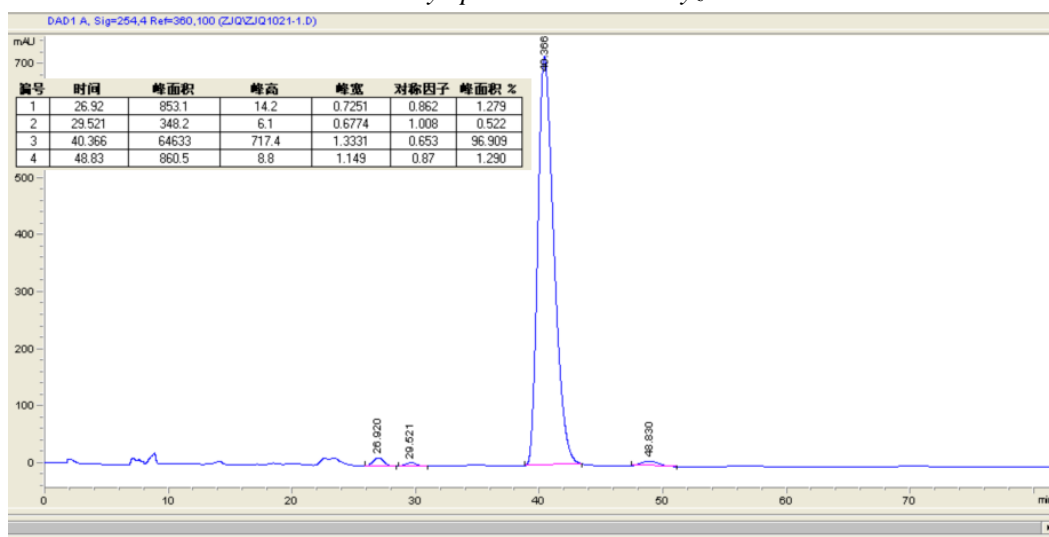

*Supported organocatalyst 3c-catalyzed adducts*

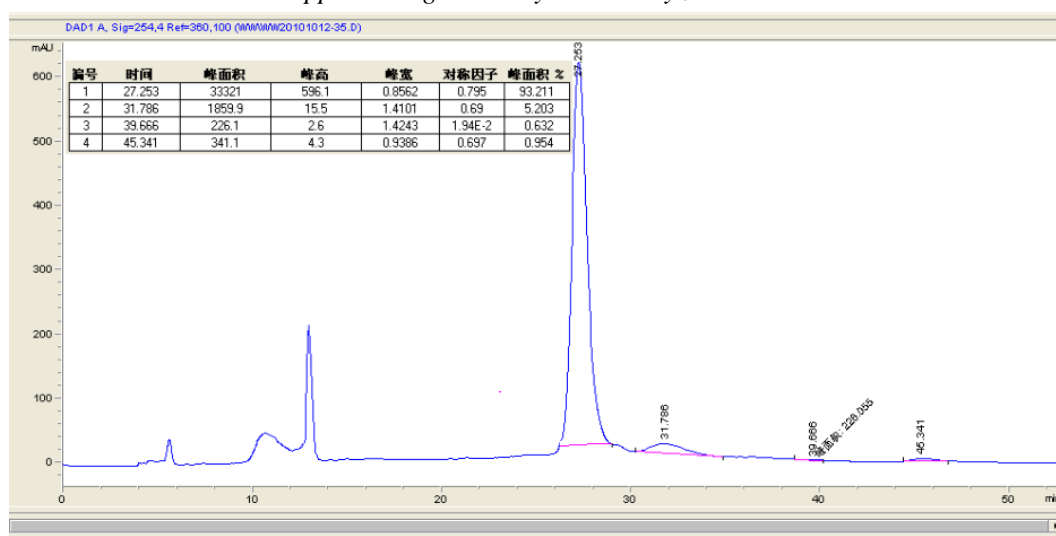

(2) The aldol adducts of *m*-nitrobenzaldehyde to cyclohexanone

Racemic compounds

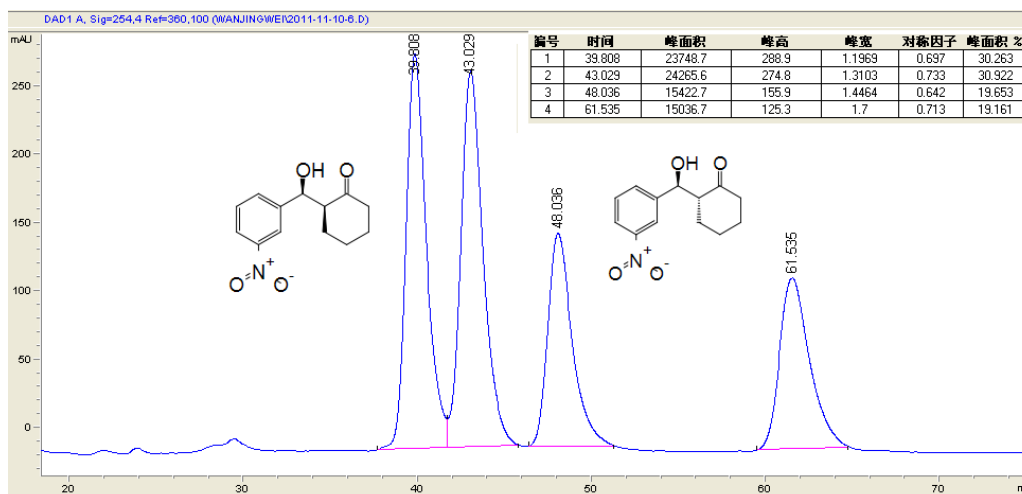

9-amino-9-deoxy-*epi*-cinchonine-catalyzed adducts

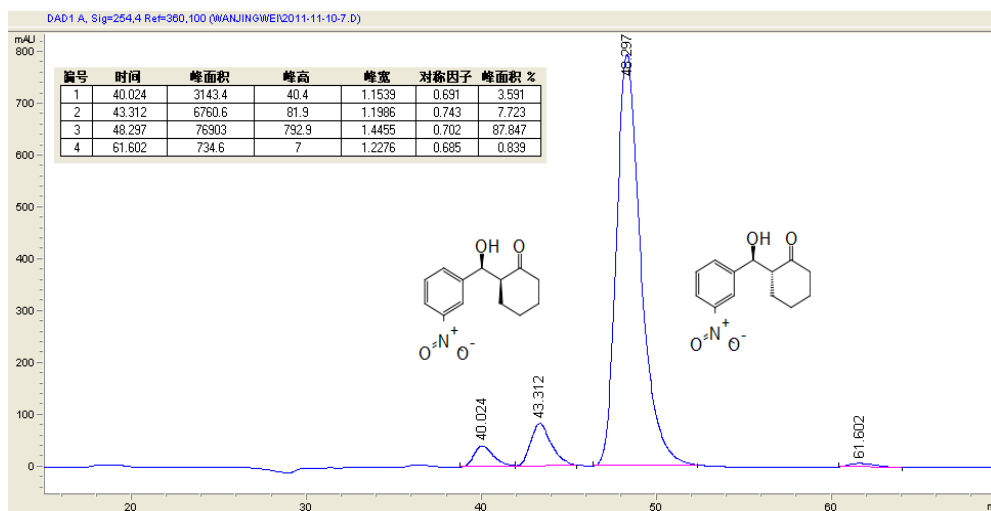

Supported organocatalyst **3c**-catalyzed adducts

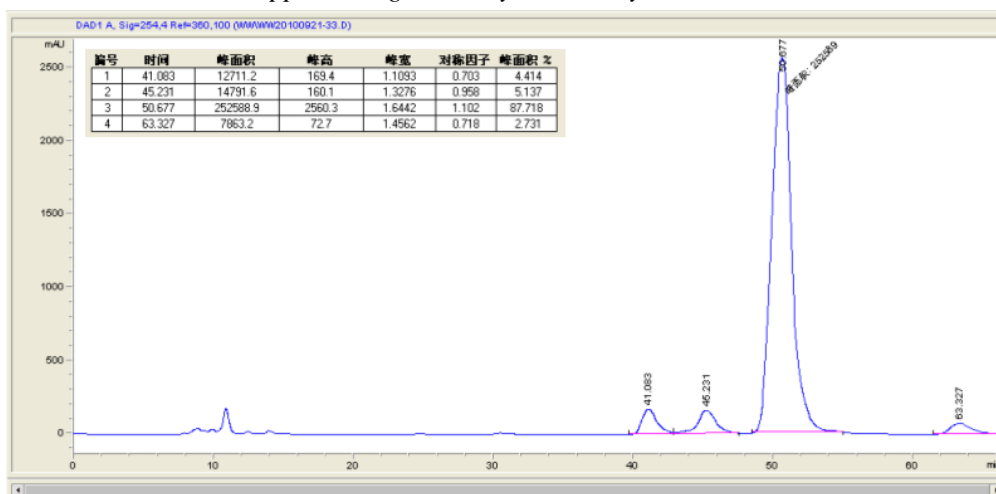

(3) The aldol adducts of *m*-nitrobenzaldehyde to cyclohexanone

Racemic compounds

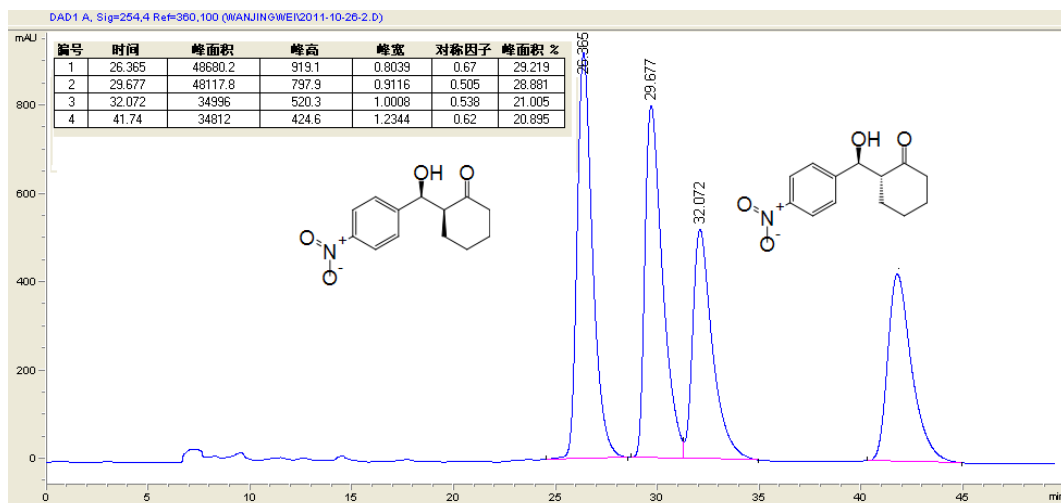

9-amino-9-deoxy-*epi*-cinchonine-catalyzed adducts

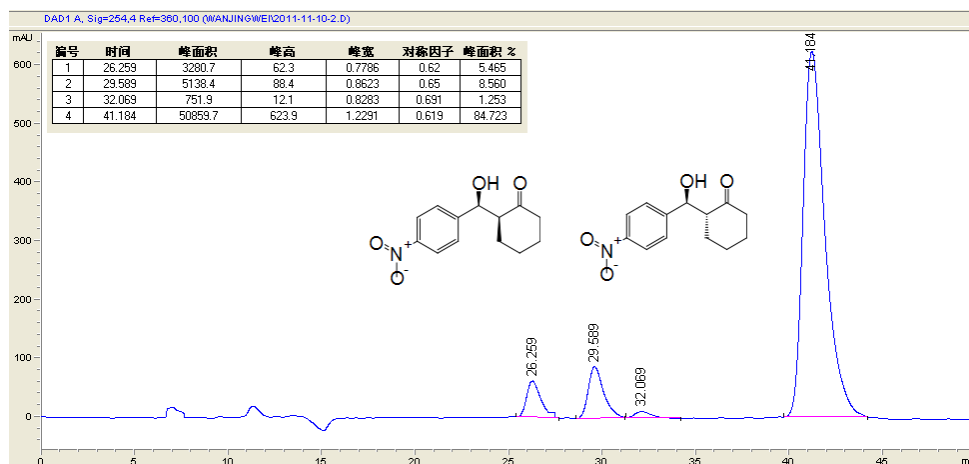

Supported organocatalyst **3c**-catalyzed adducts

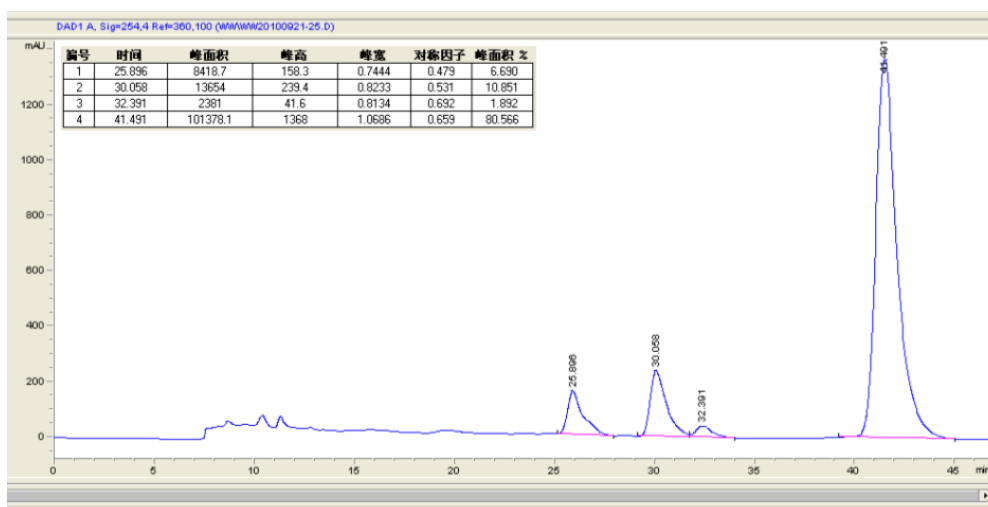

Supplement: c2dt12390h.pdf [file c2dt12390h.pdf]
